# Supplementary material for: 5-hydroxymethylcytosine marks regions with reduced mutation frequency in human DNA
Source: eLife journal article supplement (doi:10.7554/elife.17082), 2016-05-16

highly expressed genes (0.3 vs 0.7)

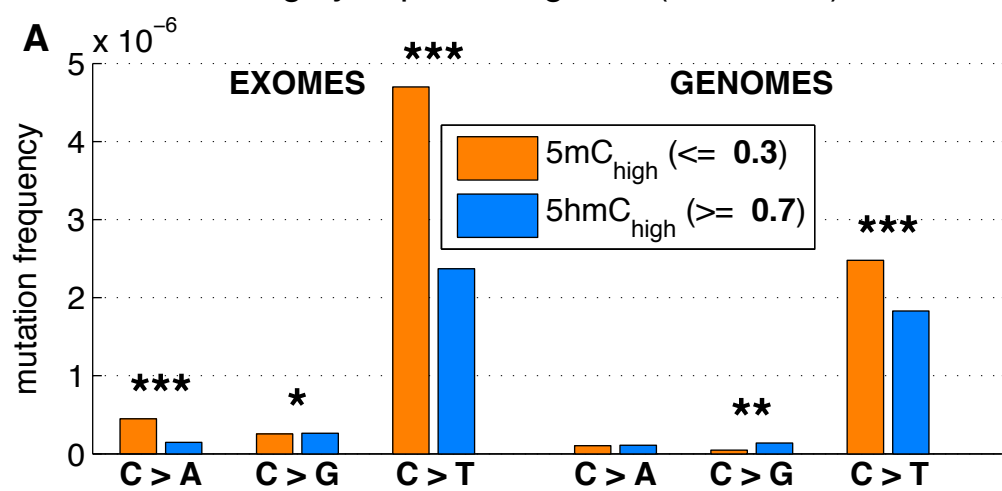

lowly expressed genes (0.3 vs 0.7)

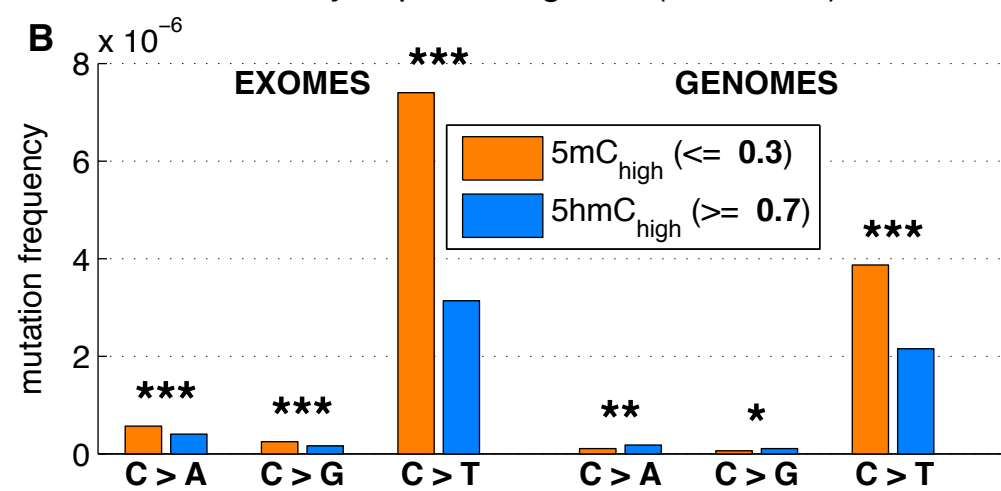

highly expressed genes (0.3 vs 0.7)

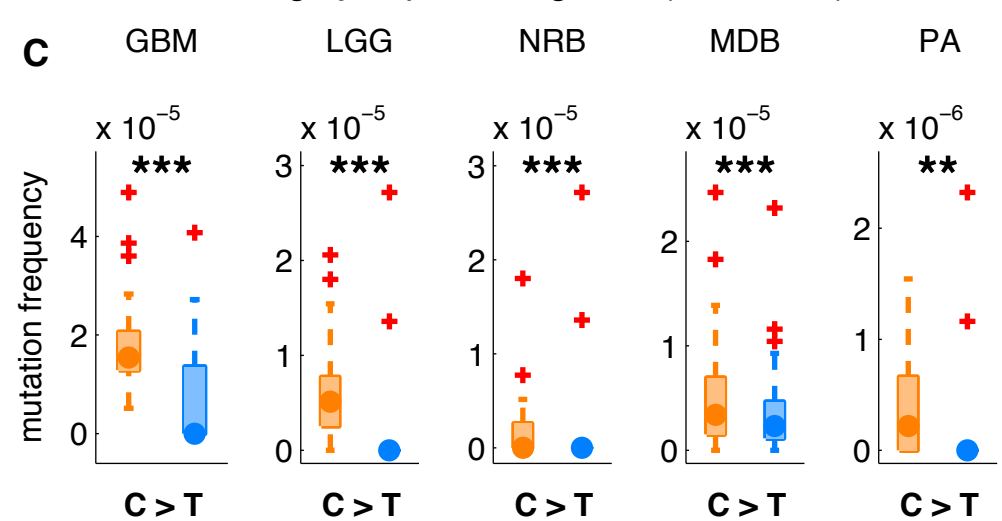

lowly expressed genes (0.3 vs 0.7)

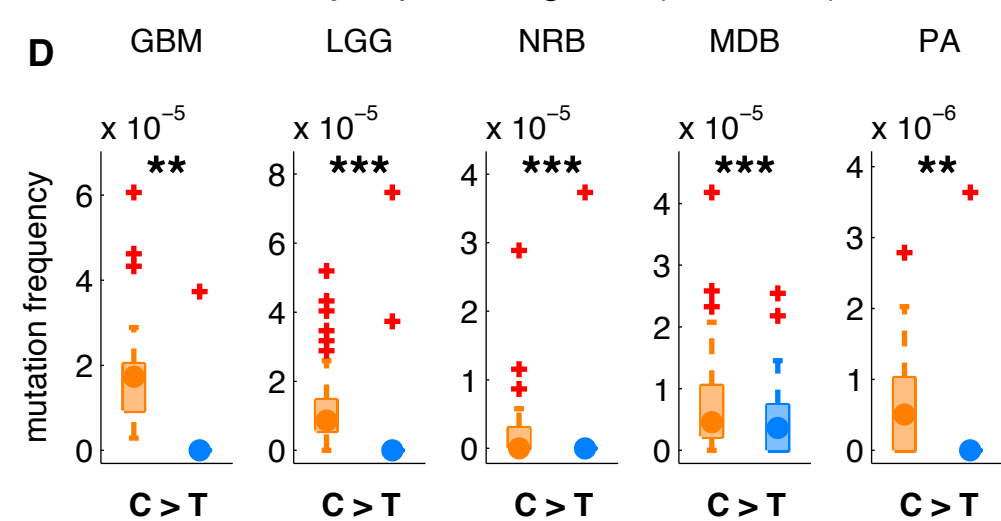

all sites (0.0 vs 0.5)

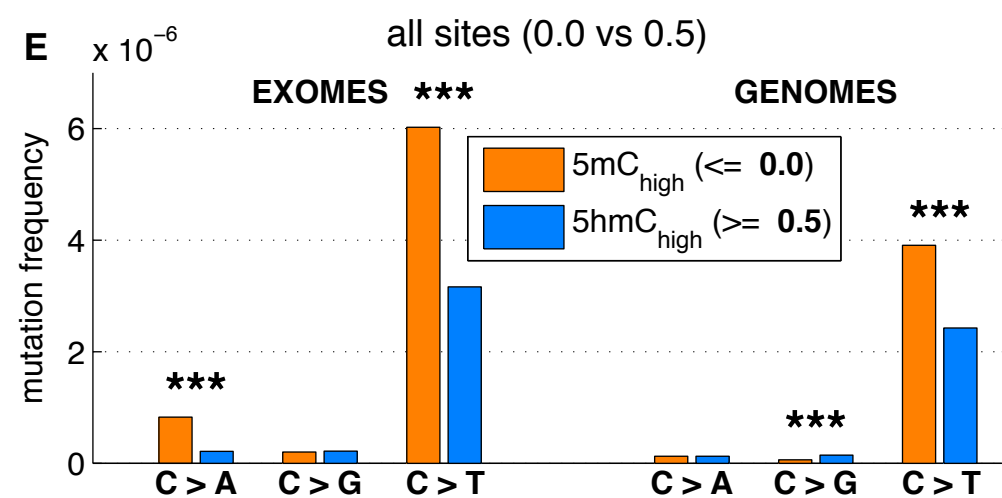

all sites C&gt;G (0.0 vs 0.5)

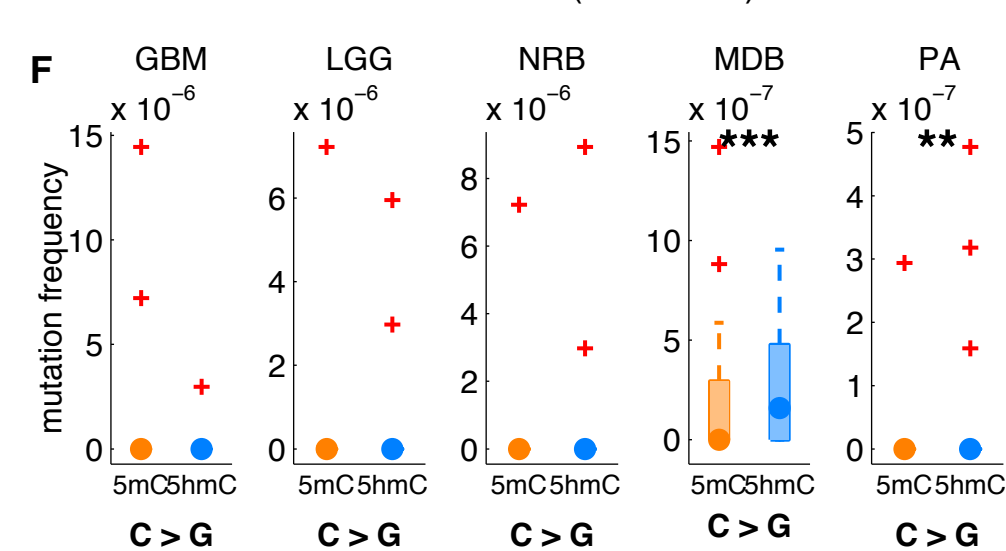

all sites (0.3 vs 0.5)

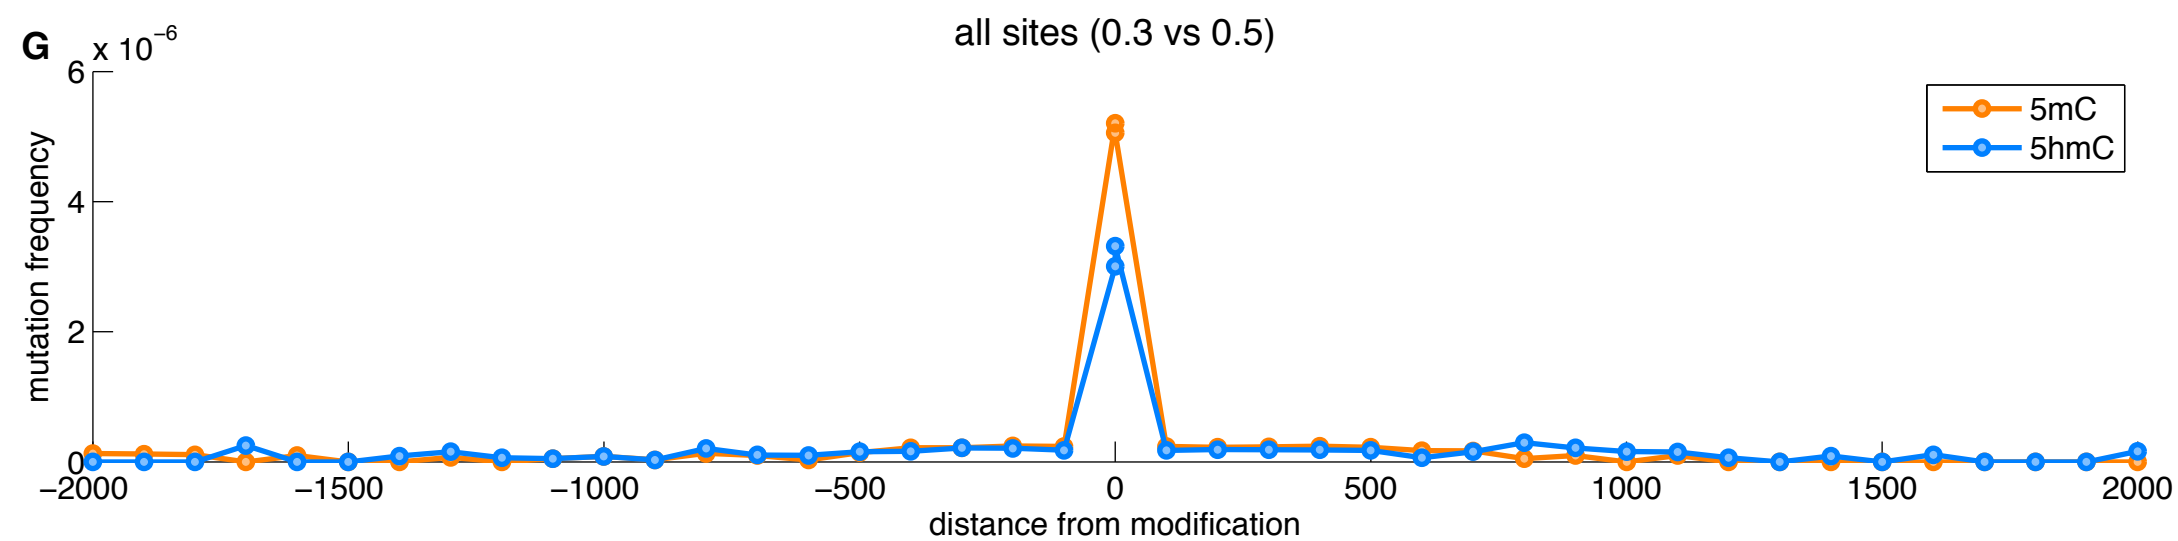

Supplement: supp [file elife-17082-supp-v1.zip]
