# Supplementary material for: 5-hydroxymethylcytosine marks regions with reduced mutation frequency in human DNA
Source: eLife journal article supplement (doi:10.7554/elife.17082), 2016-05-16
Supplement: supp [file elife-17082-supp-v1.zip]

Archive with 12 entries (12 files):
- elife_poa_e17082_Figure_5_figure_supplement_3.tif
- elife_poa_e17082_Figure_2_figure_supplement_1.tif
- elife_poa_e17082_Figure_6_figure_supplement_1.tif
- elife_poa_e17082_Figure_1_figure_supplement_1.pdf
- elife_poa_e17082_Figure_6_figure_supplement_2.tif
- elife_poa_e17082_Figure_3_figure_supplement_1.pdf
- elife_poa_e17082_Figure_1_figure_supplement_2.pdf
- elife_poa_e17082_Figure_4_figure_supplement_1.tif
- elife_poa_e17082_Figure_5_figure_supplement_2.tif
- elife_poa_e17082_Figure_1_figure_supplement_3.pdf
- elife_poa_e17082_Figure_6_figure_supplement_3.pdf
- elife_poa_e17082_Figure_5_figure_supplement_1.pdf
