# Supplementary figures and images for: 5-hydroxymethylcytosine marks regions with reduced mutation frequency in human DNA
Source: eLife journal article supplement (doi:10.7554/elife.17082), 2016-05-16

# Predicting CpG>T, windows 100kbp, chr 1-11

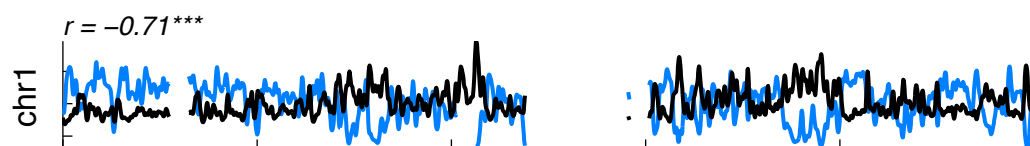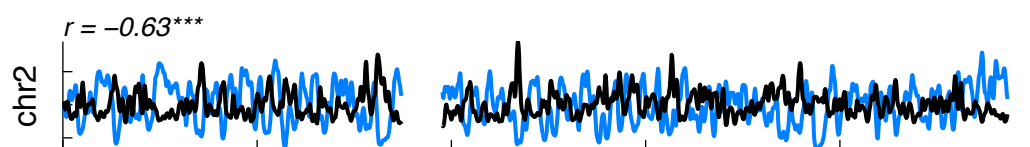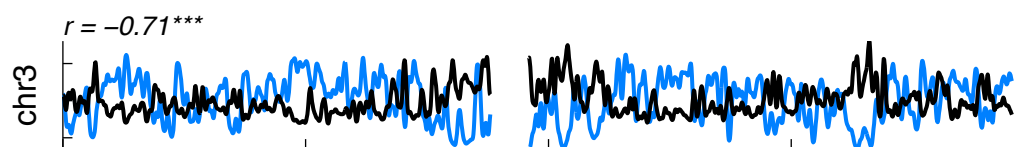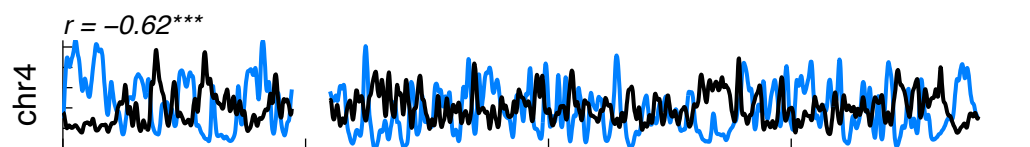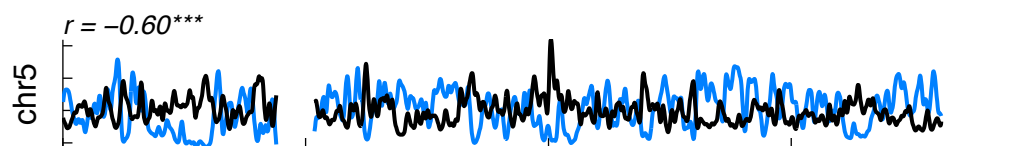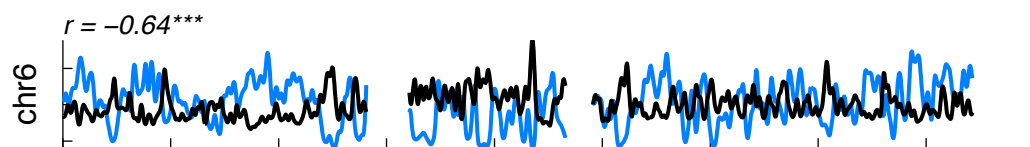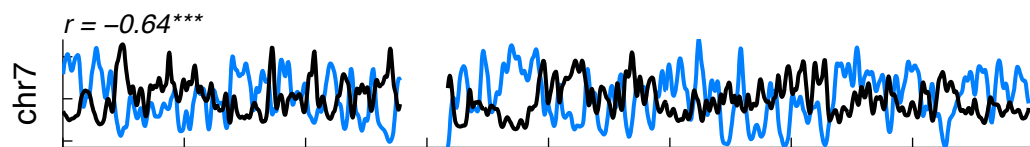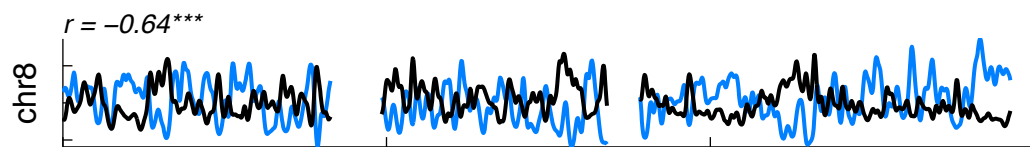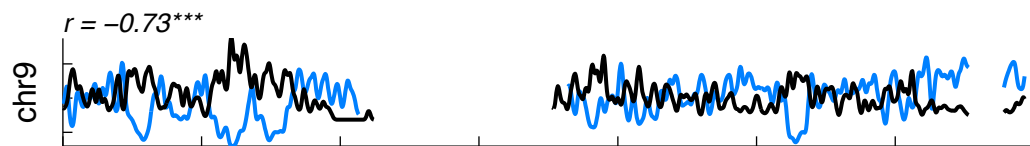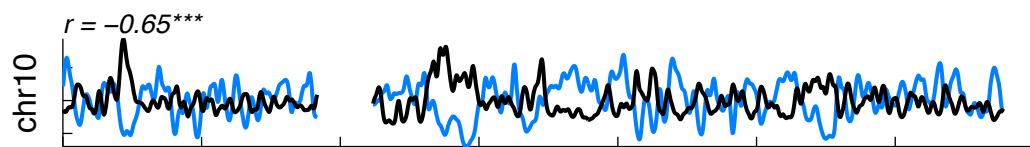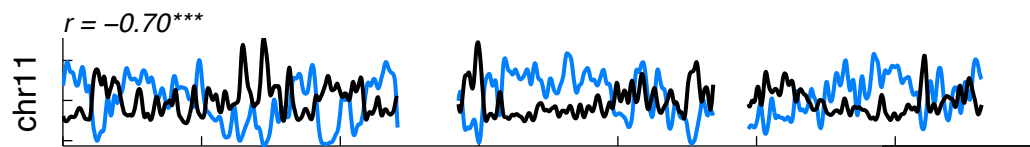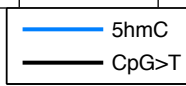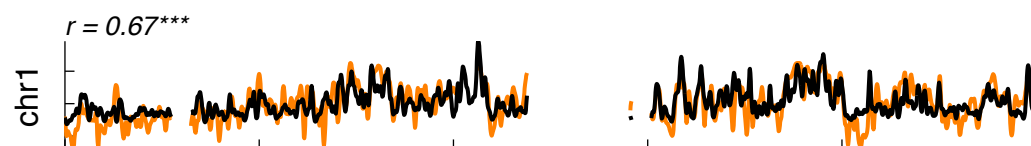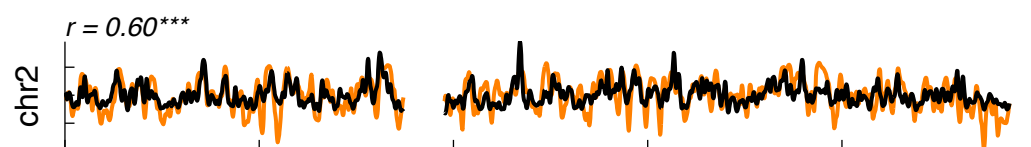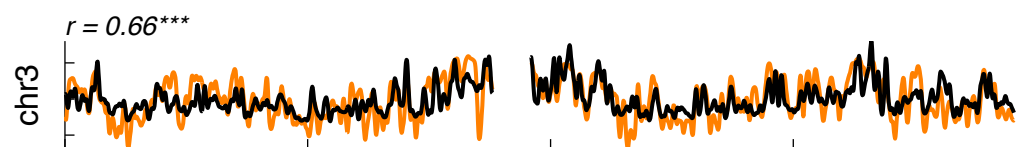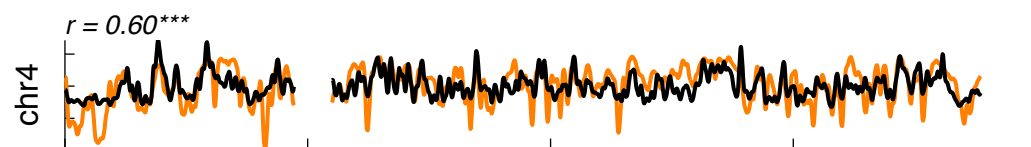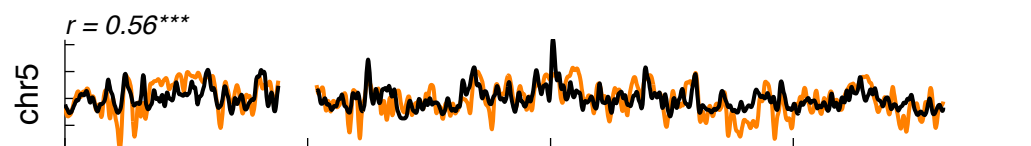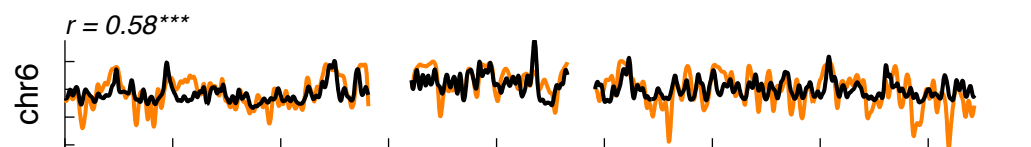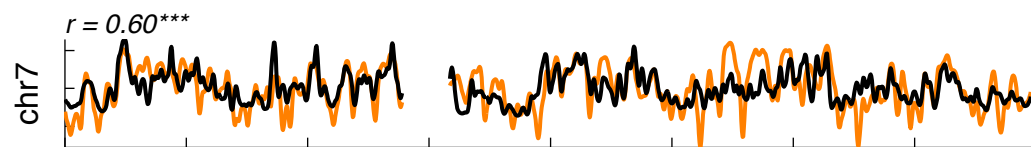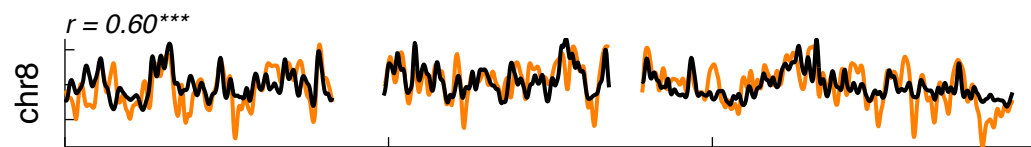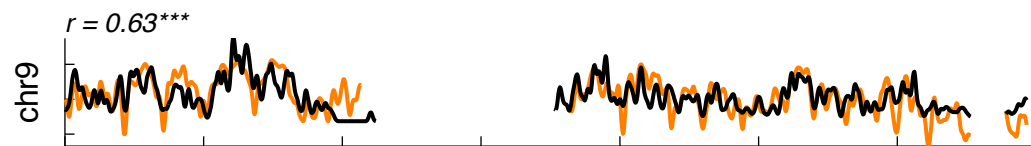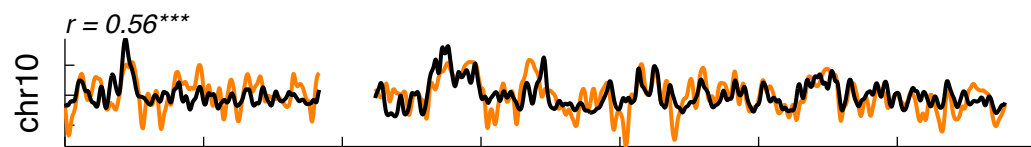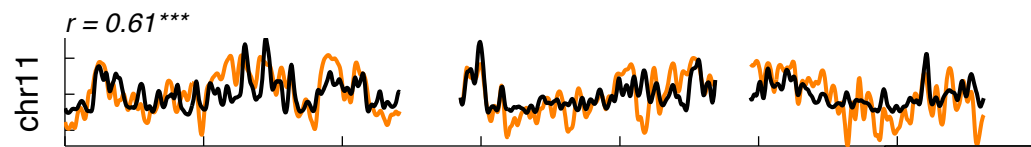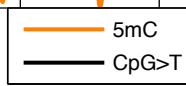

Supplement: supp [file elife-17082-supp-v1.zip]

# Predicting CpG>T on chromosome 3, windows 100kbp

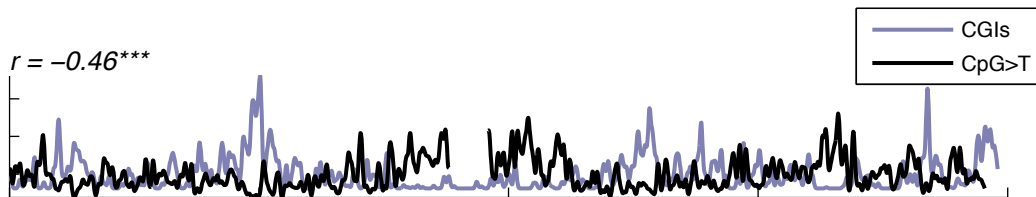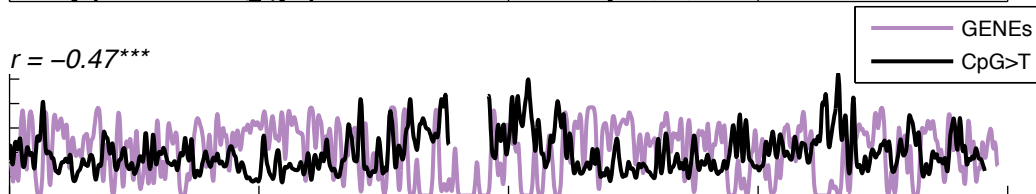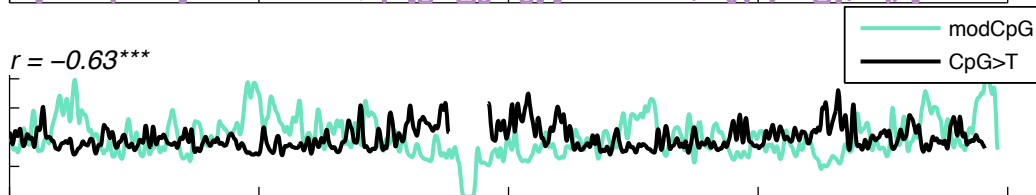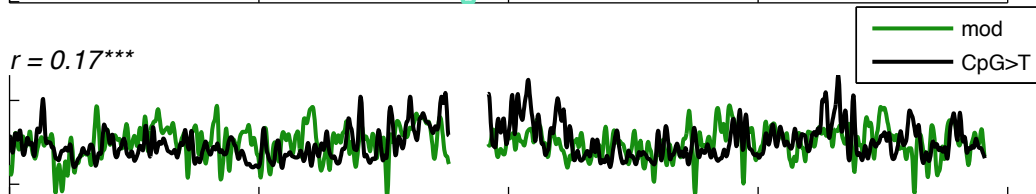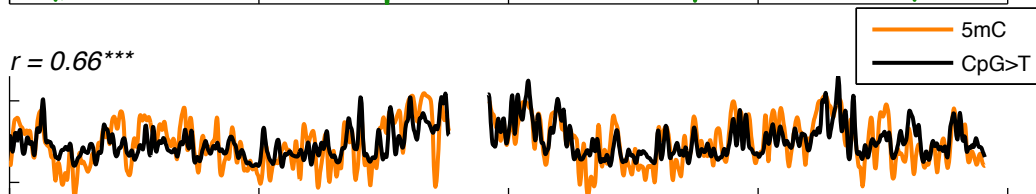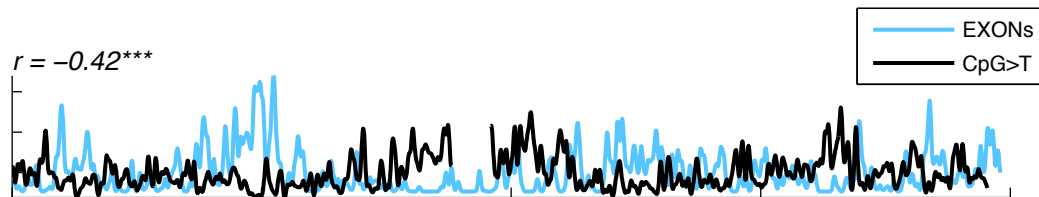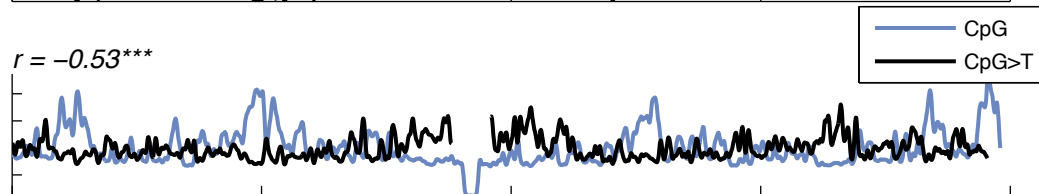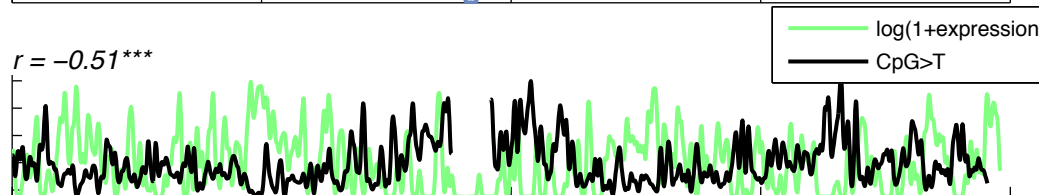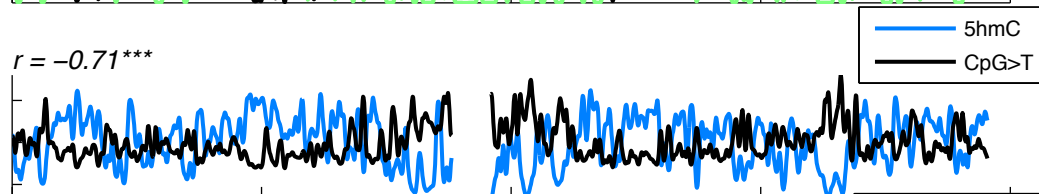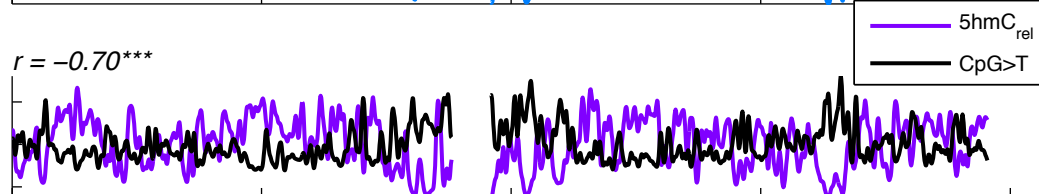

Supplement: supp [file elife-17082-supp-v1.zip]

# Predicting CpG>T, windows 100kbp, chr 12–22

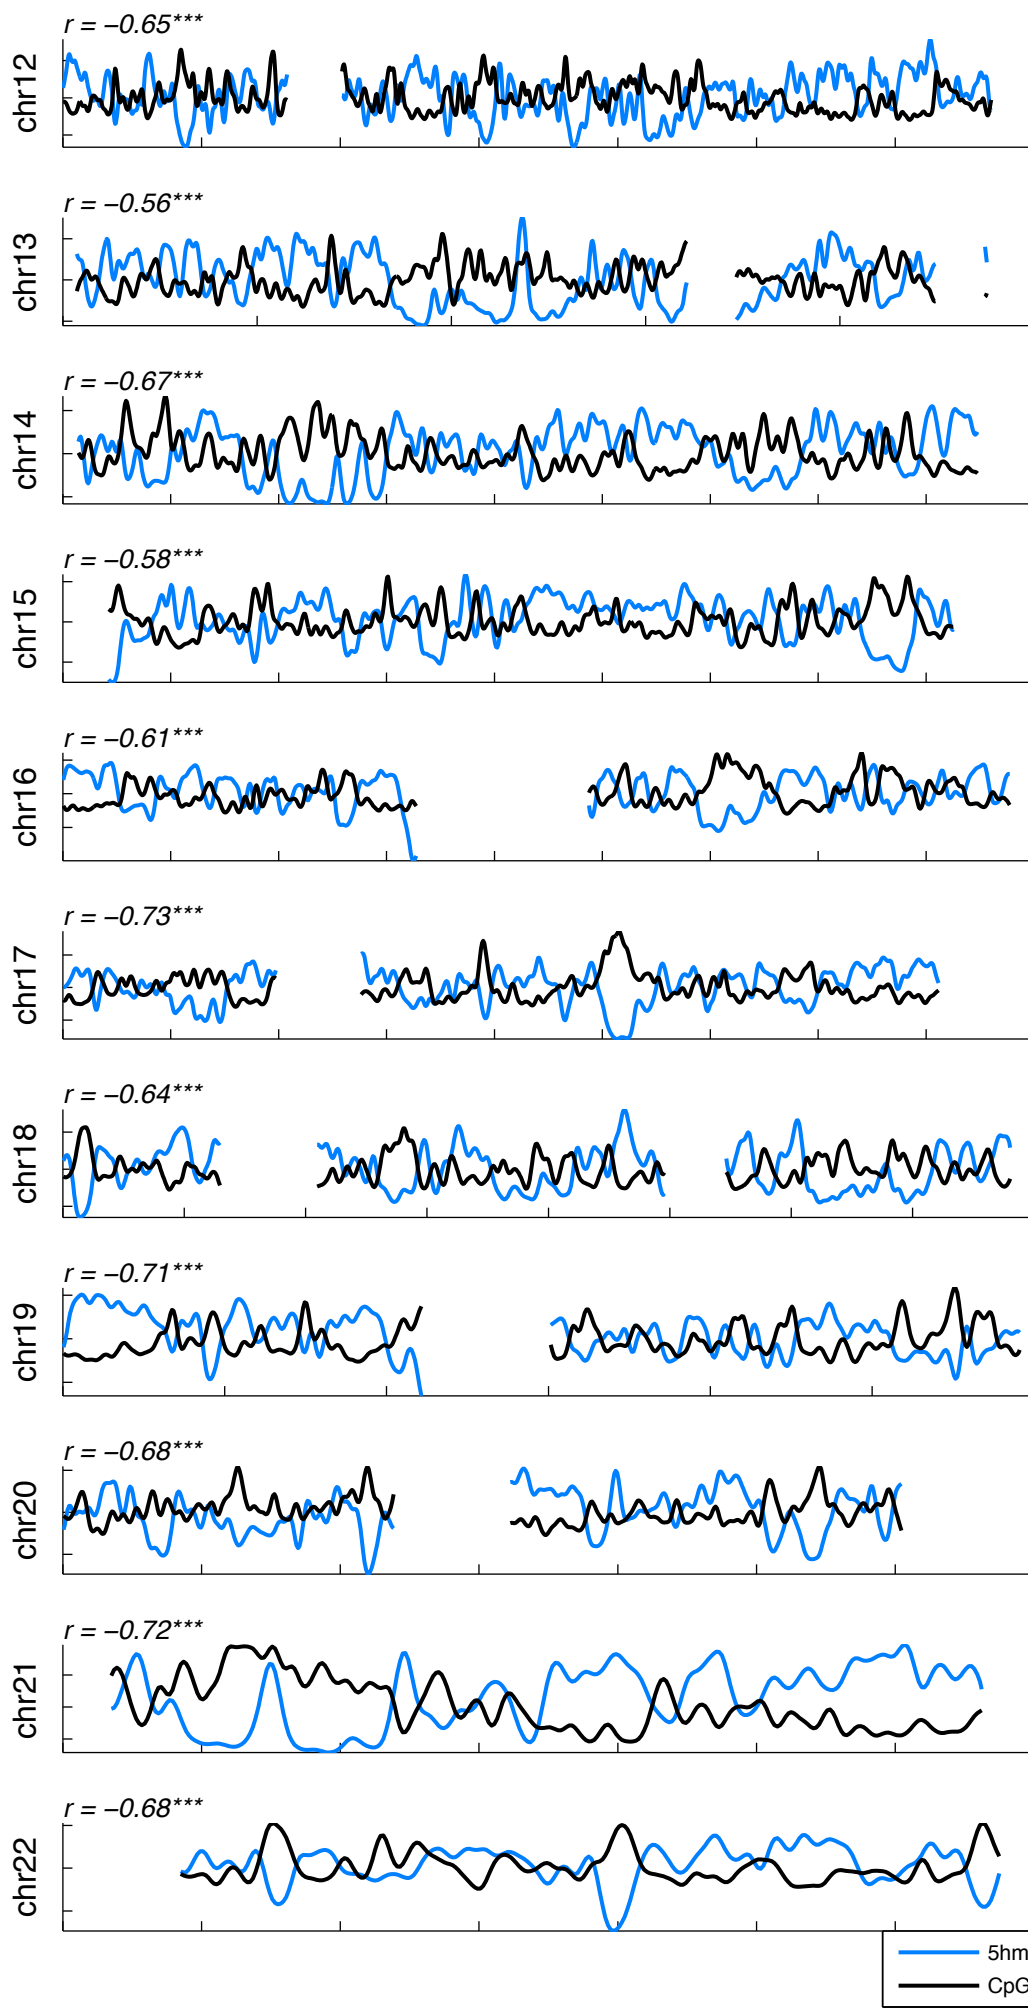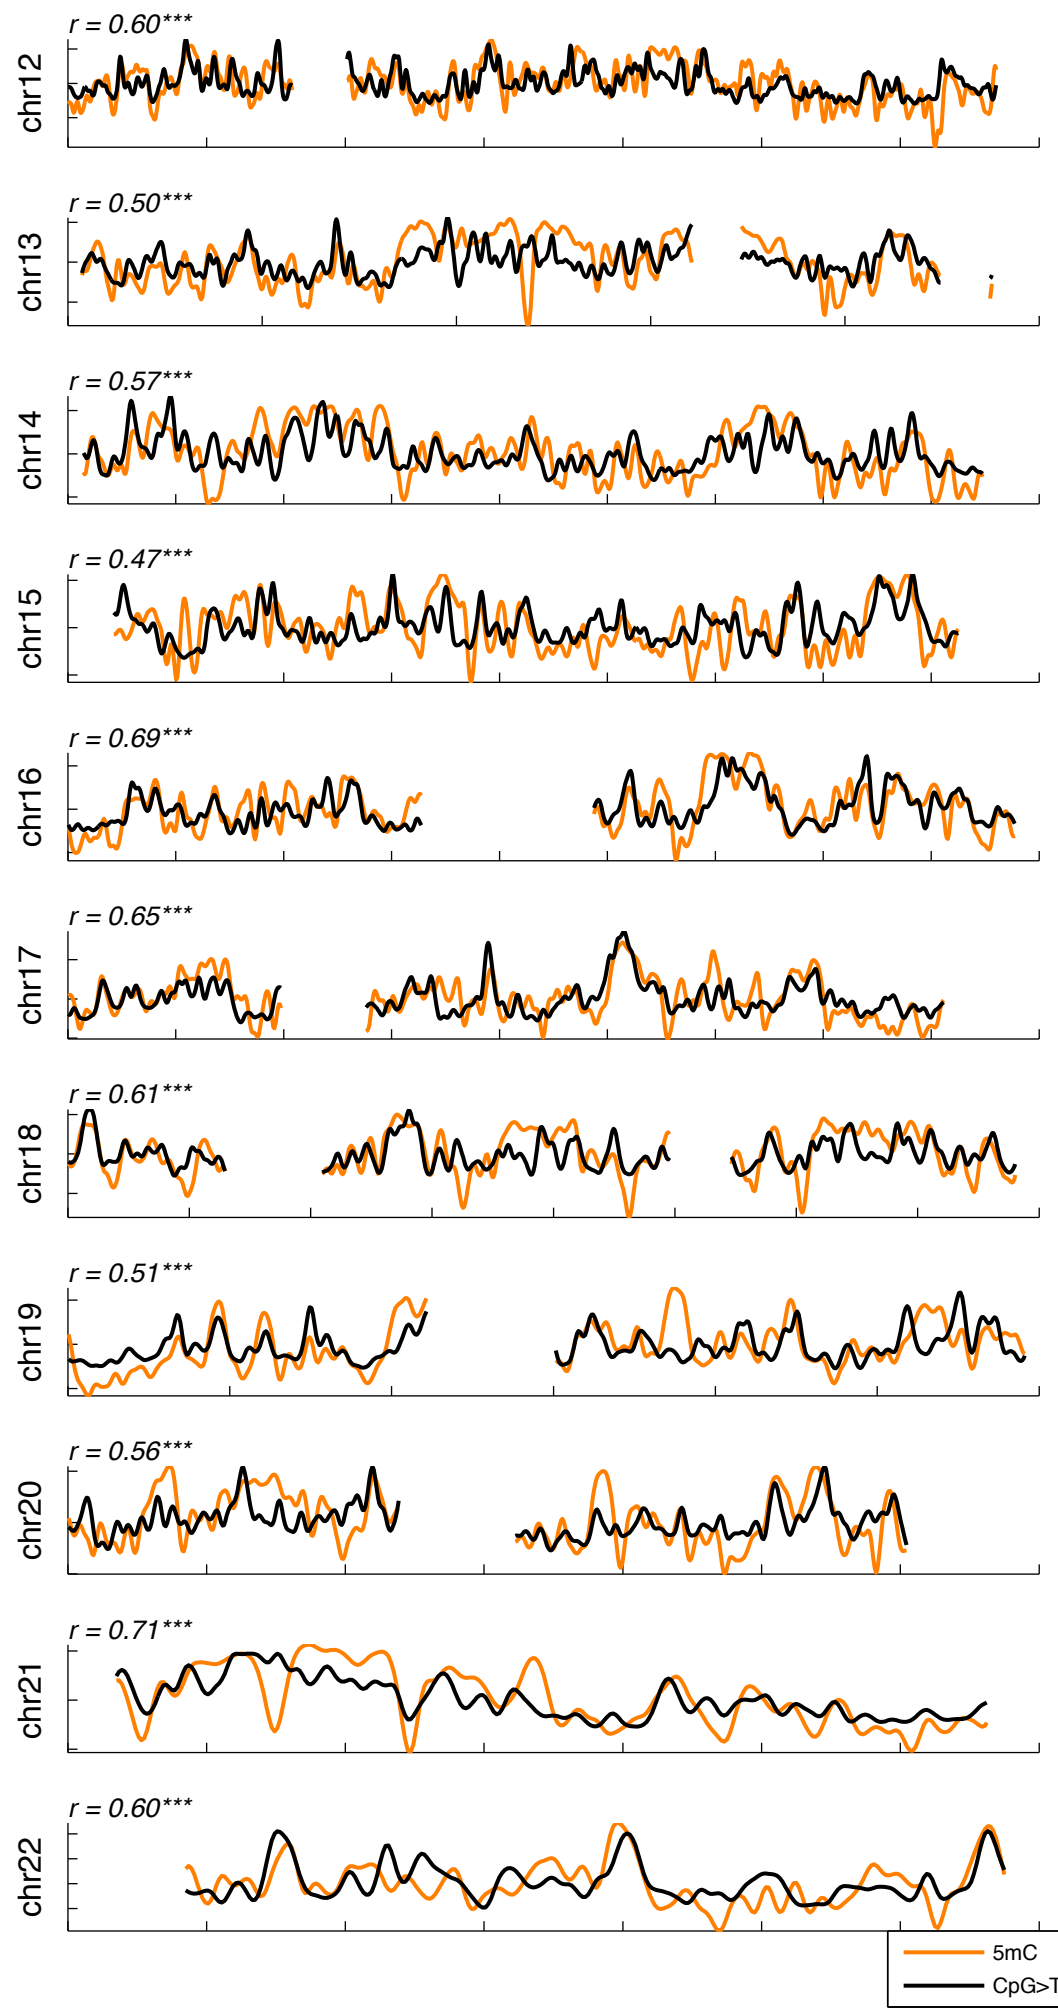

Supplement: supp [file elife-17082-supp-v1.zip]

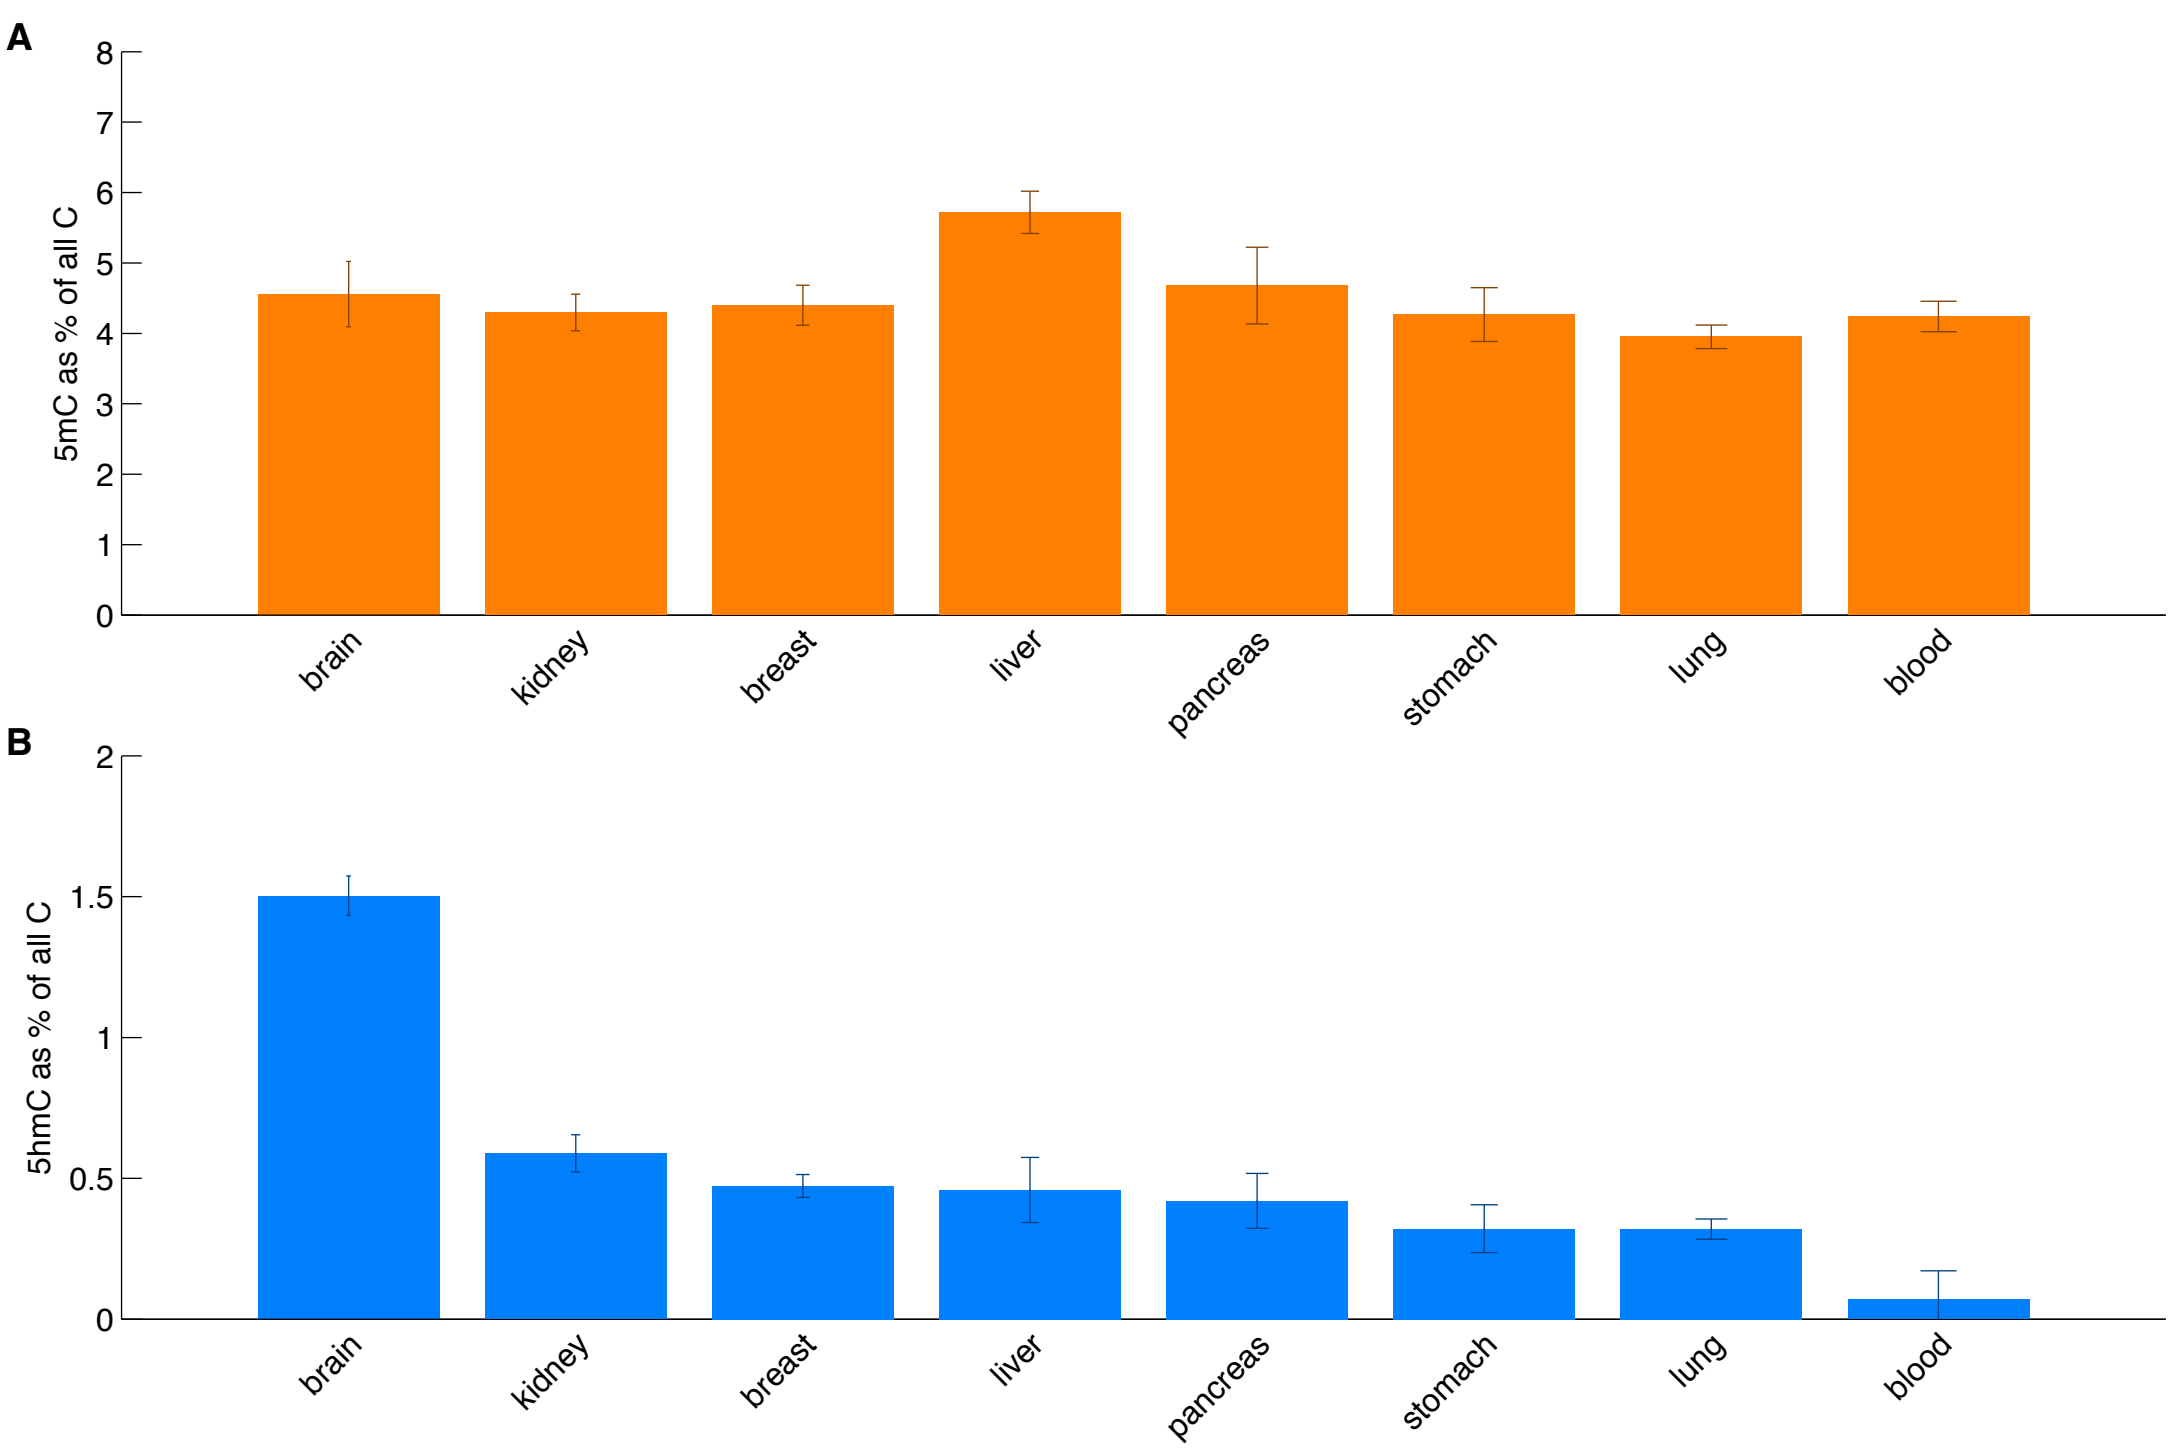

Supplement: supp [file elife-17082-supp-v1.zip]

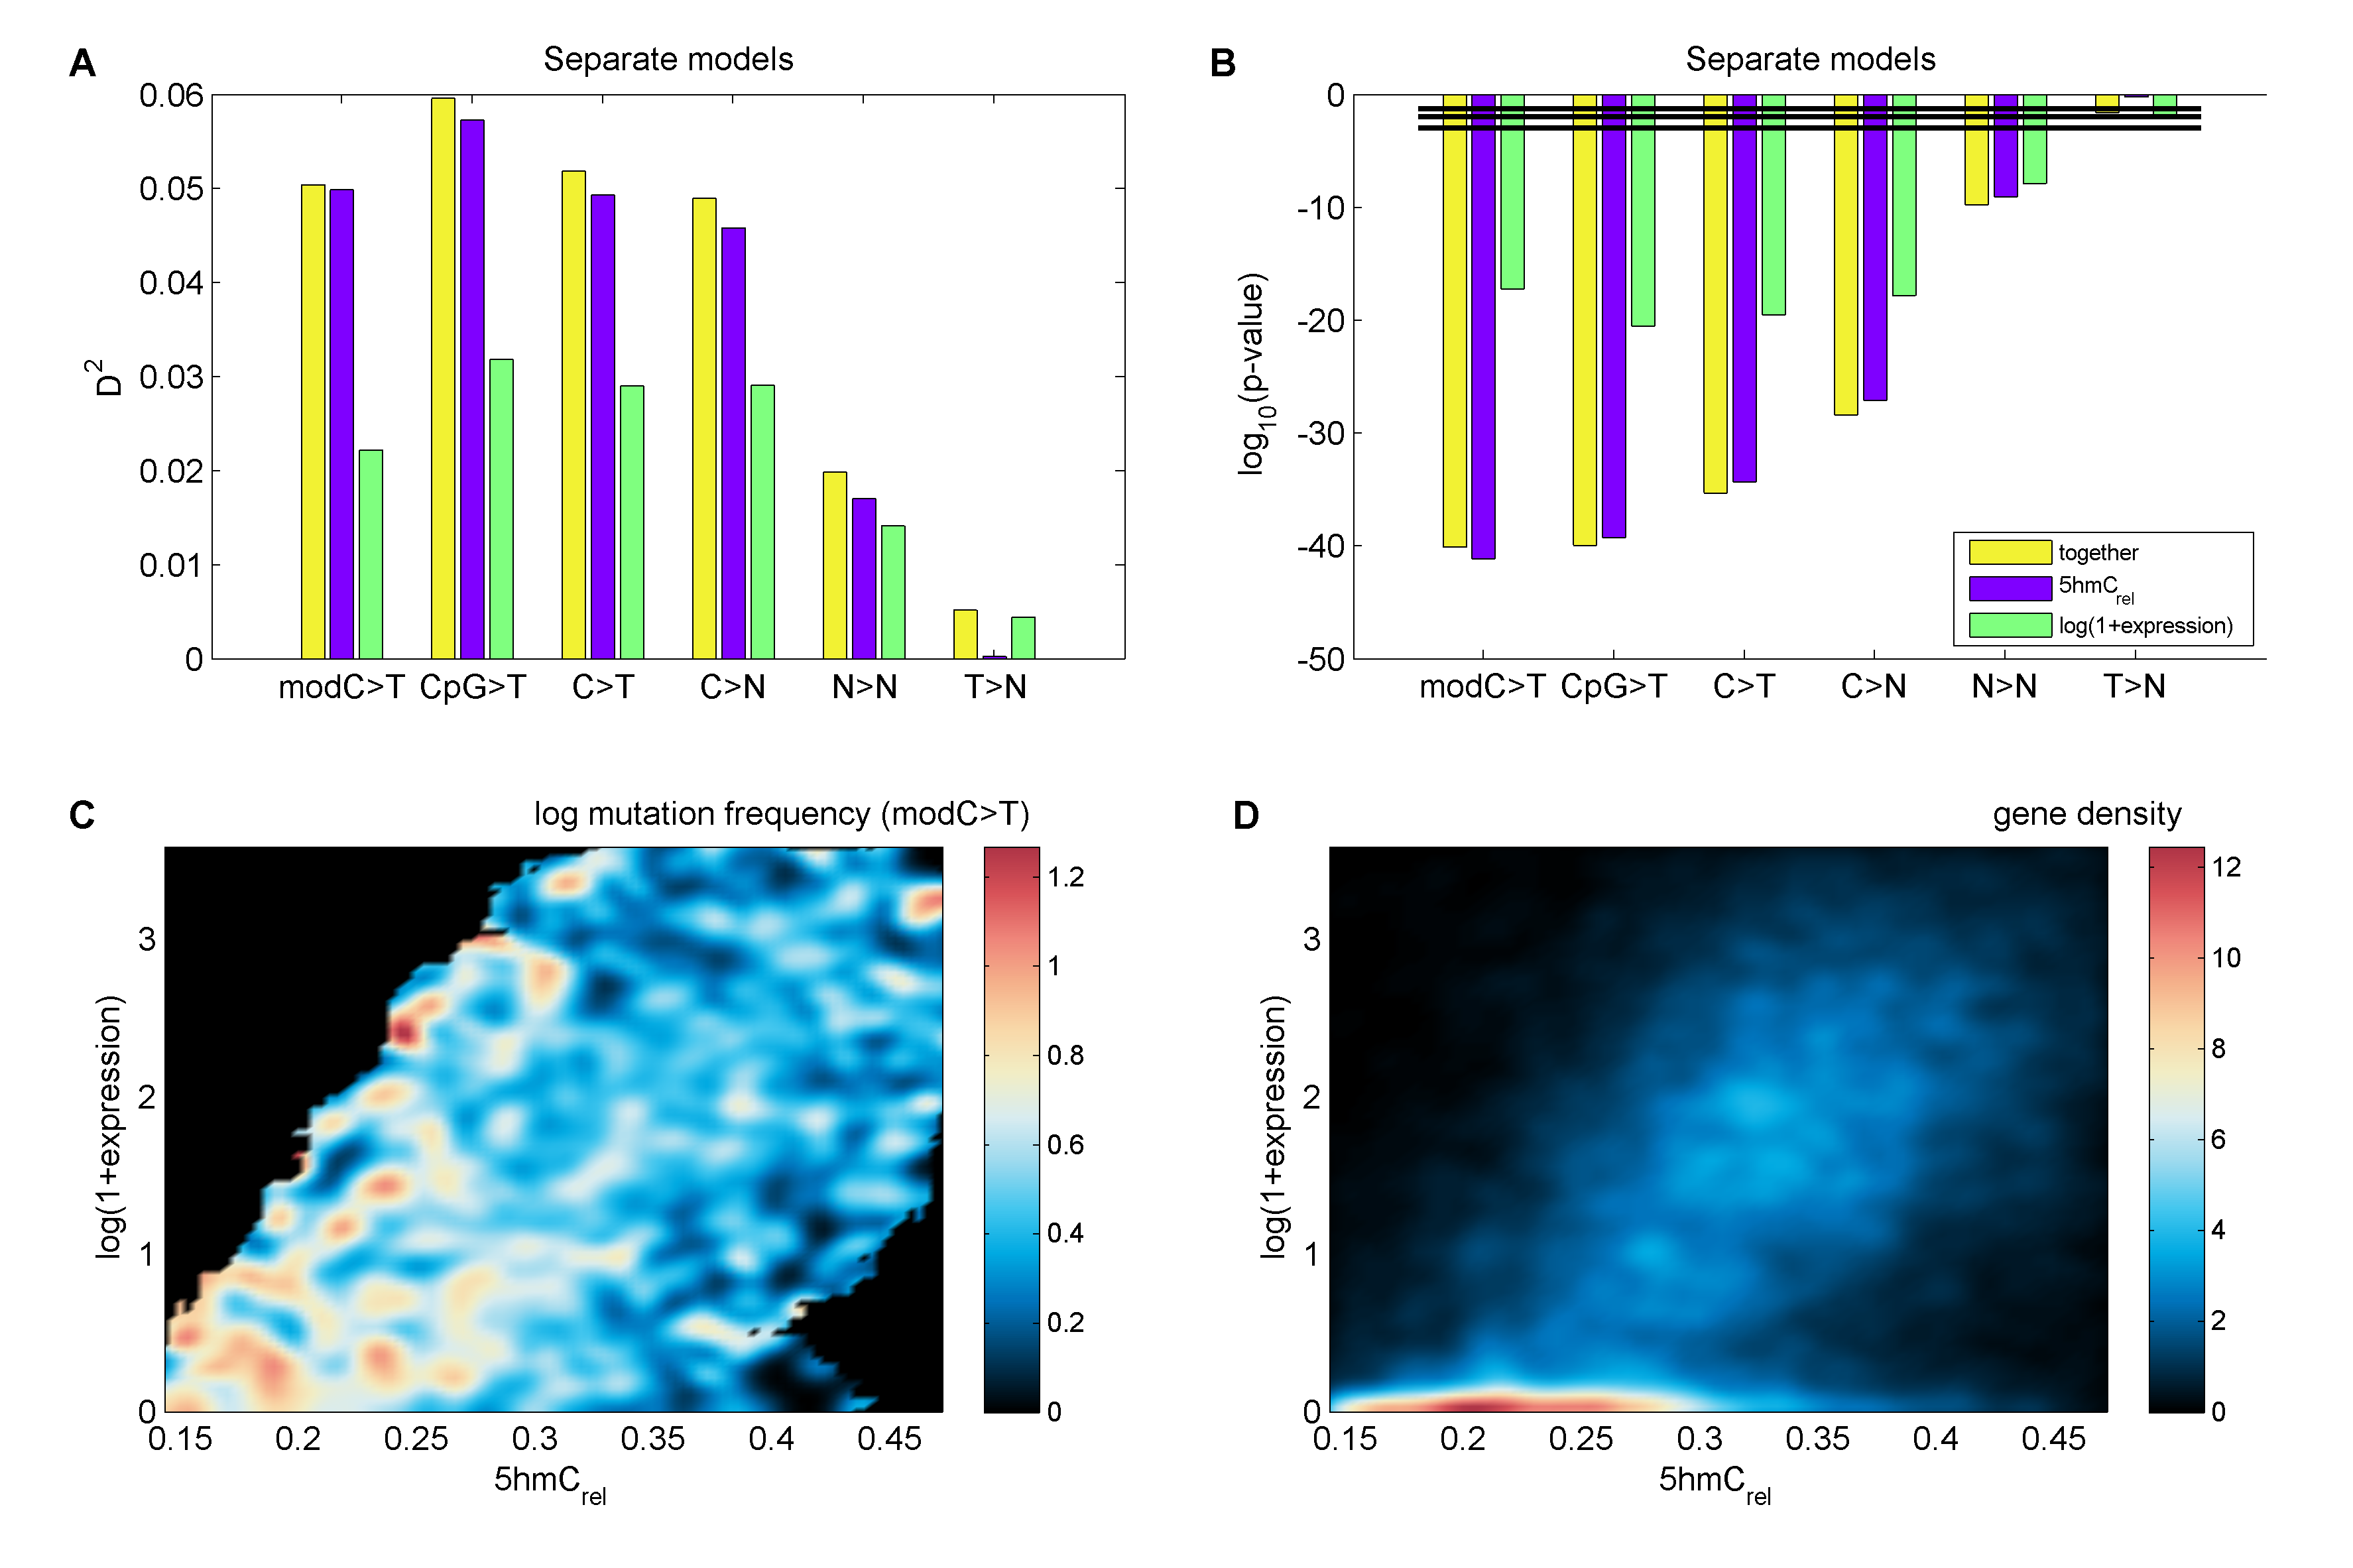

Supplement: supp [file elife-17082-supp-v1.zip › elife_poa_e17082_Figure_5_figure_supplement_3.tif]

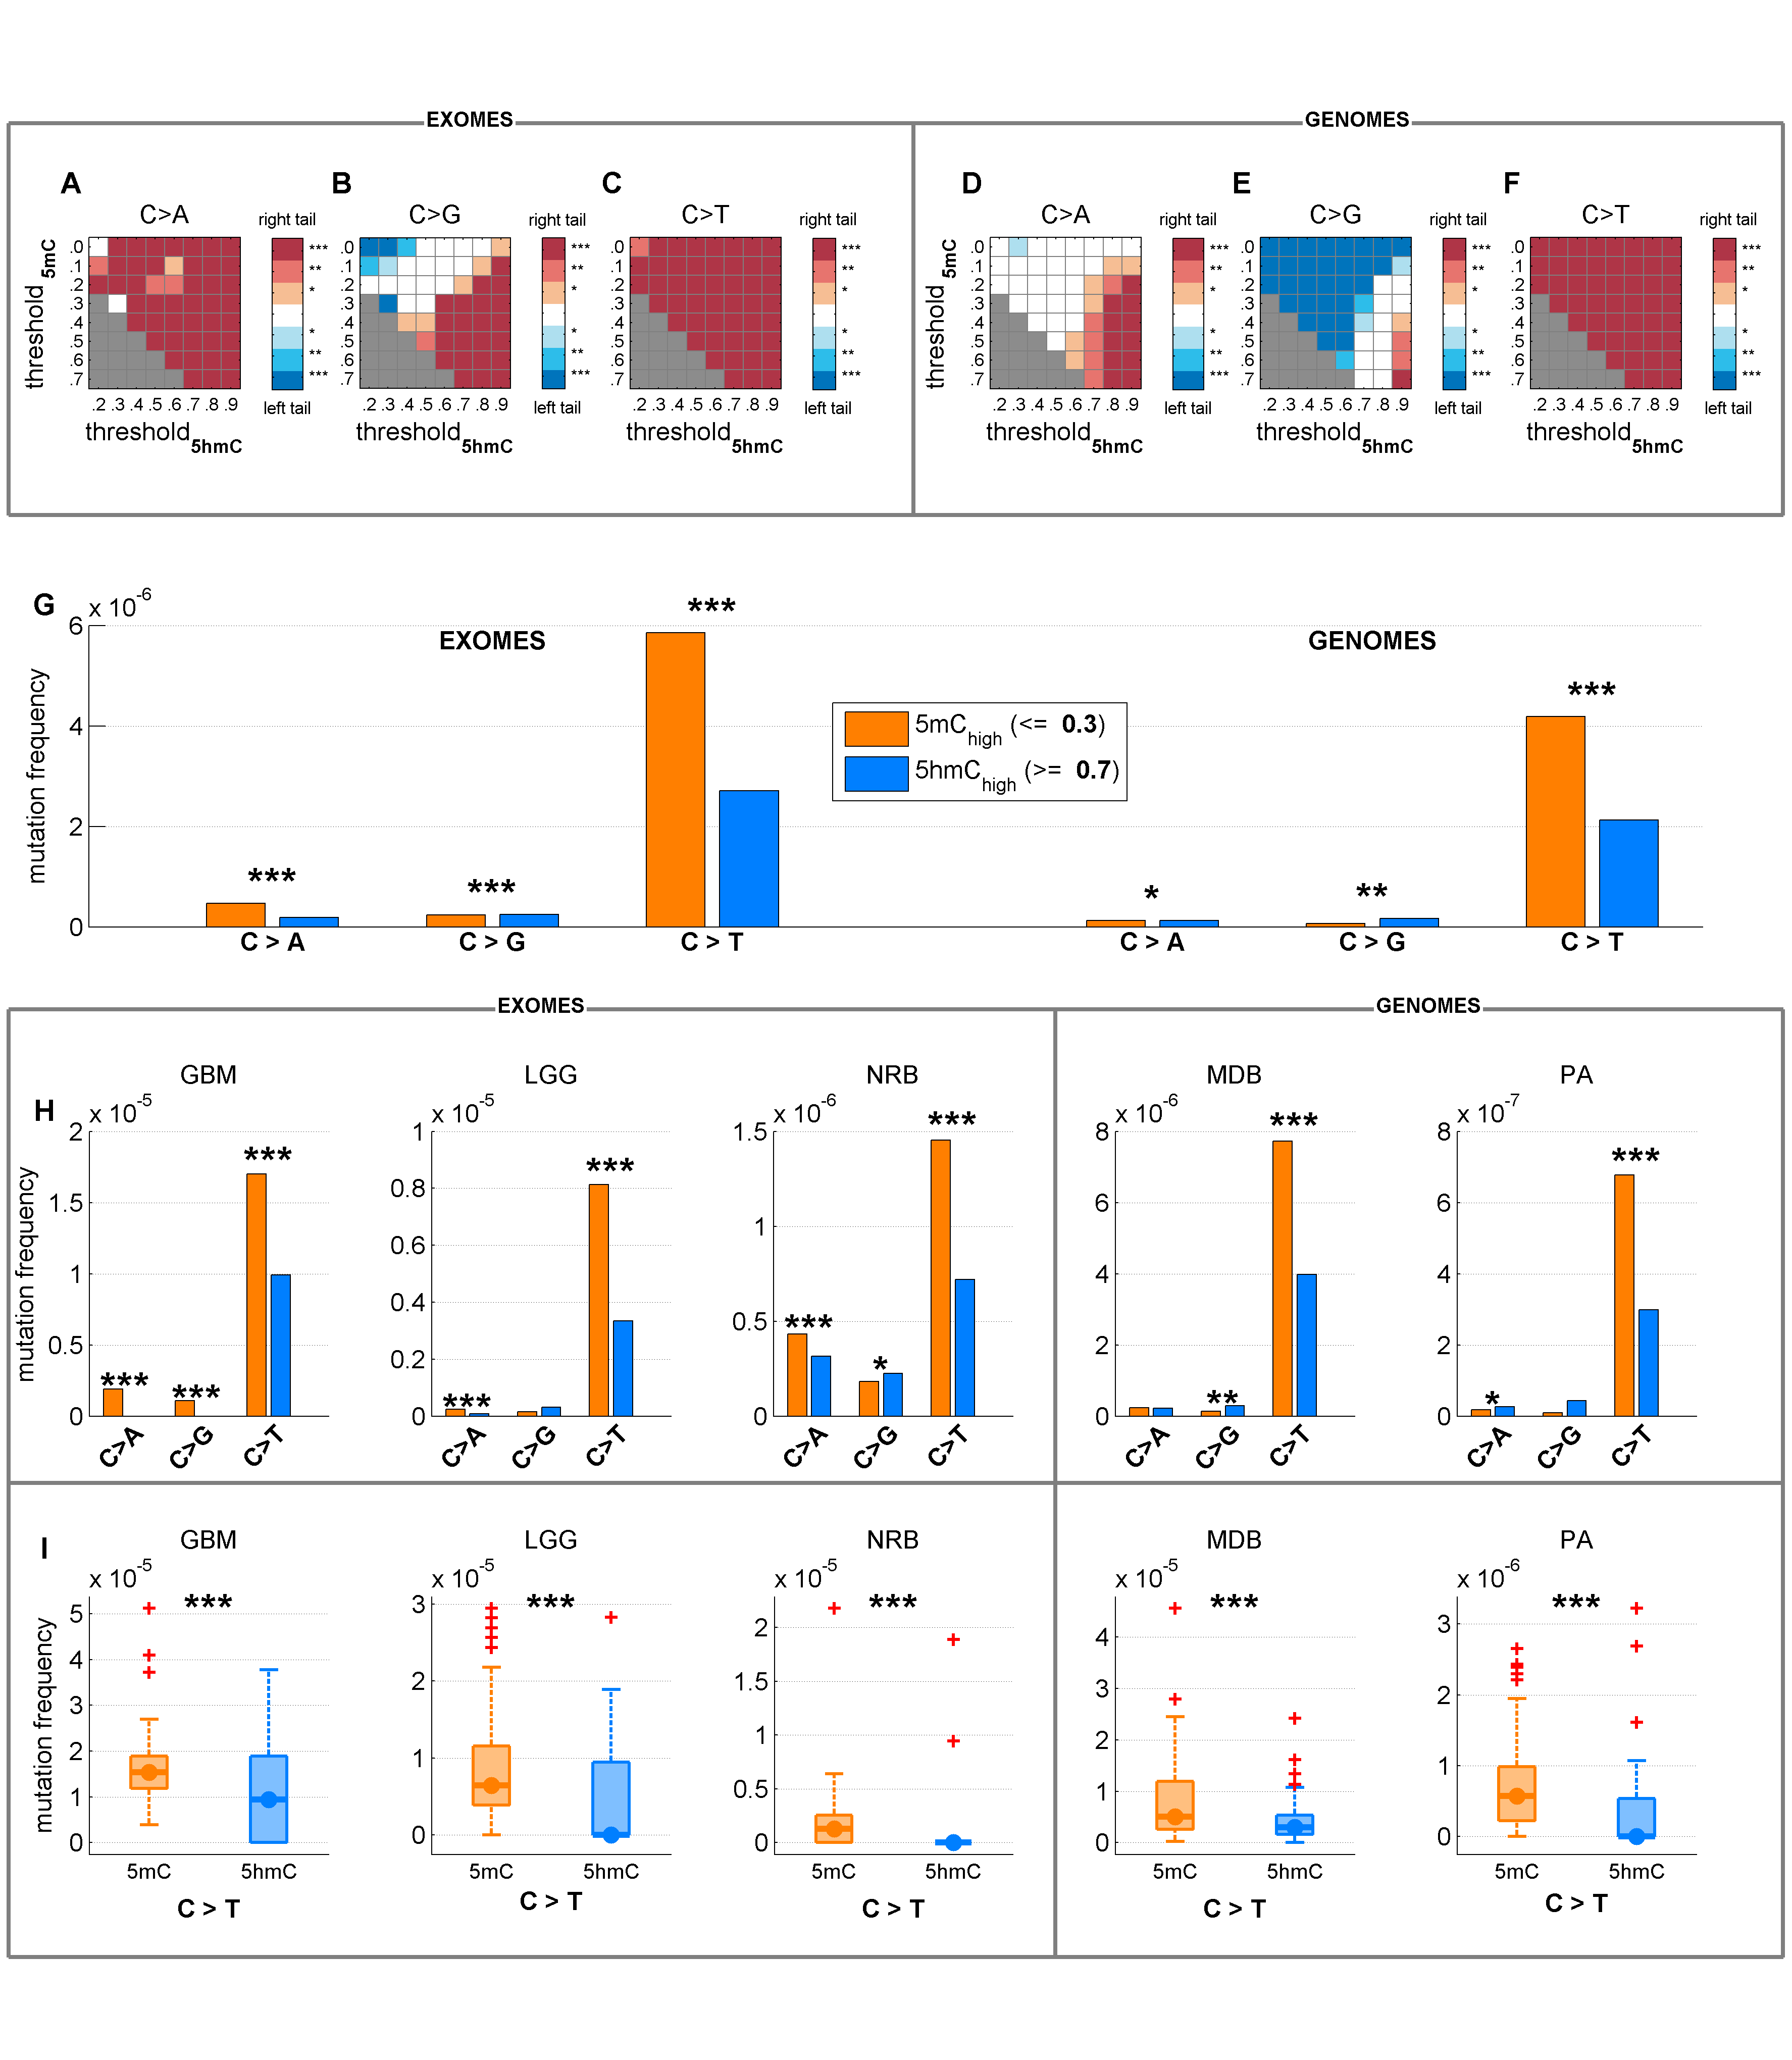

Supplement: supp [file elife-17082-supp-v1.zip › elife_poa_e17082_Figure_2_figure_supplement_1.tif]

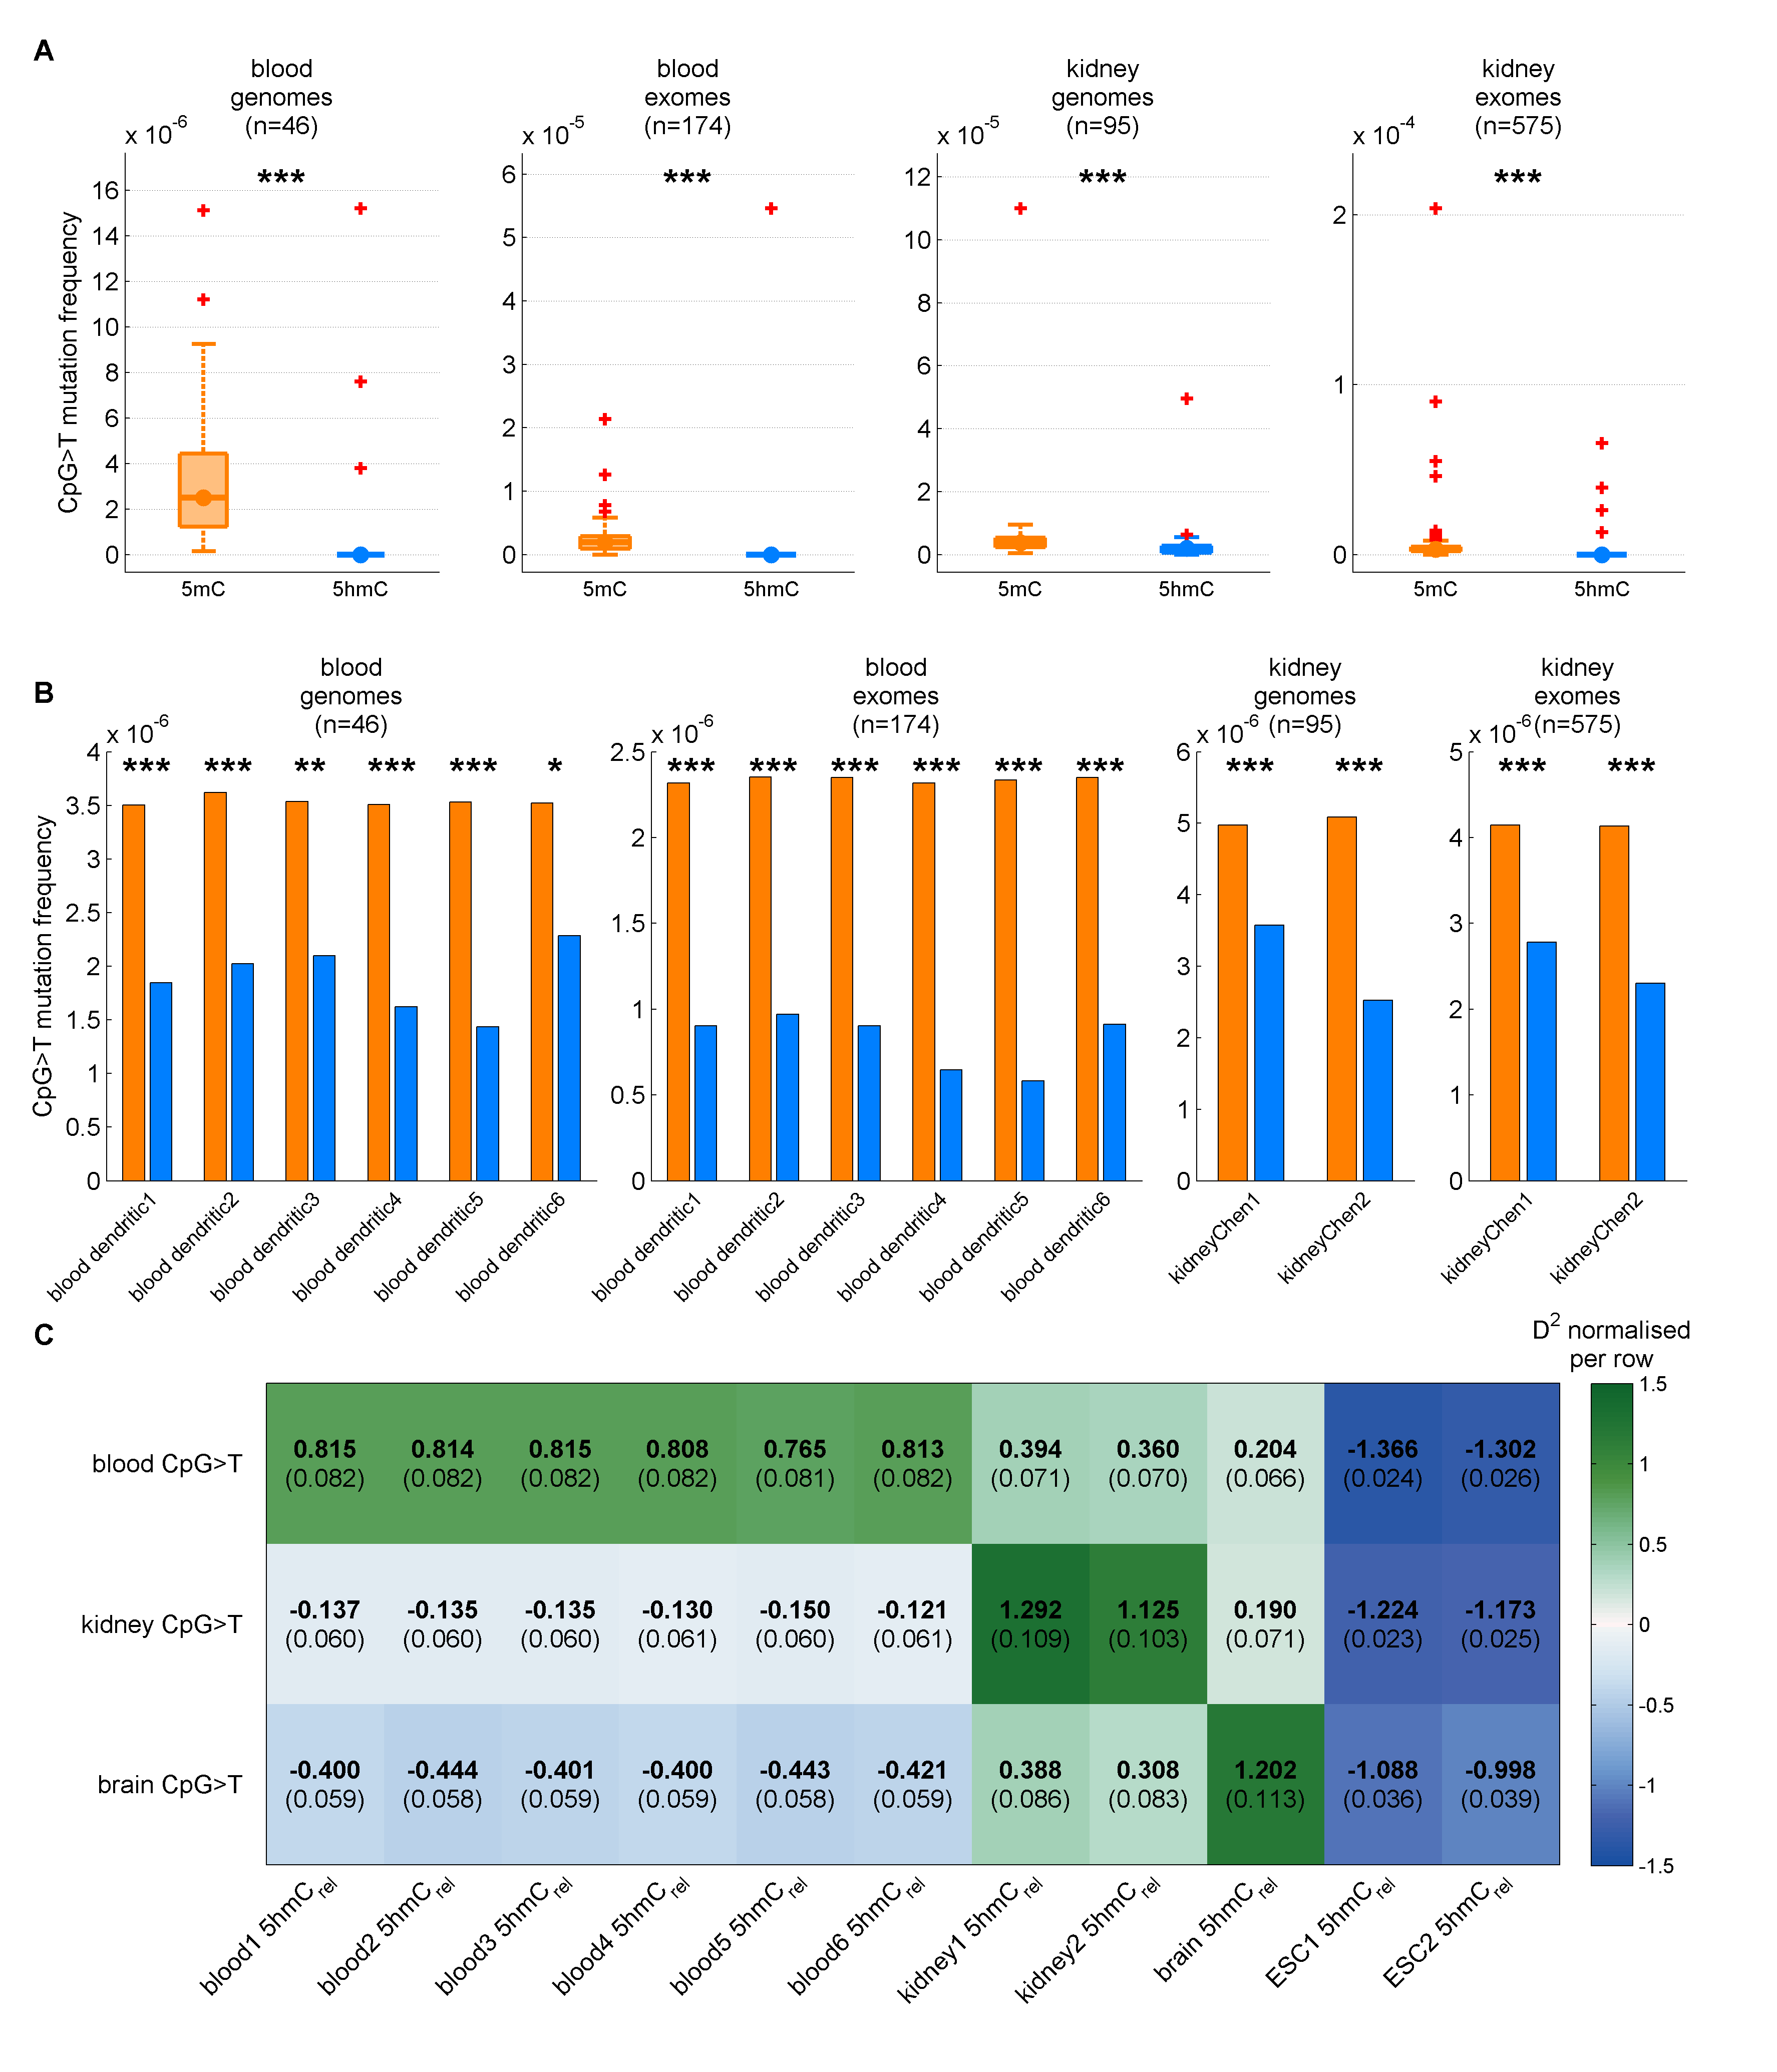

Supplement: supp [file elife-17082-supp-v1.zip › elife_poa_e17082_Figure_6_figure_supplement_1.tif]

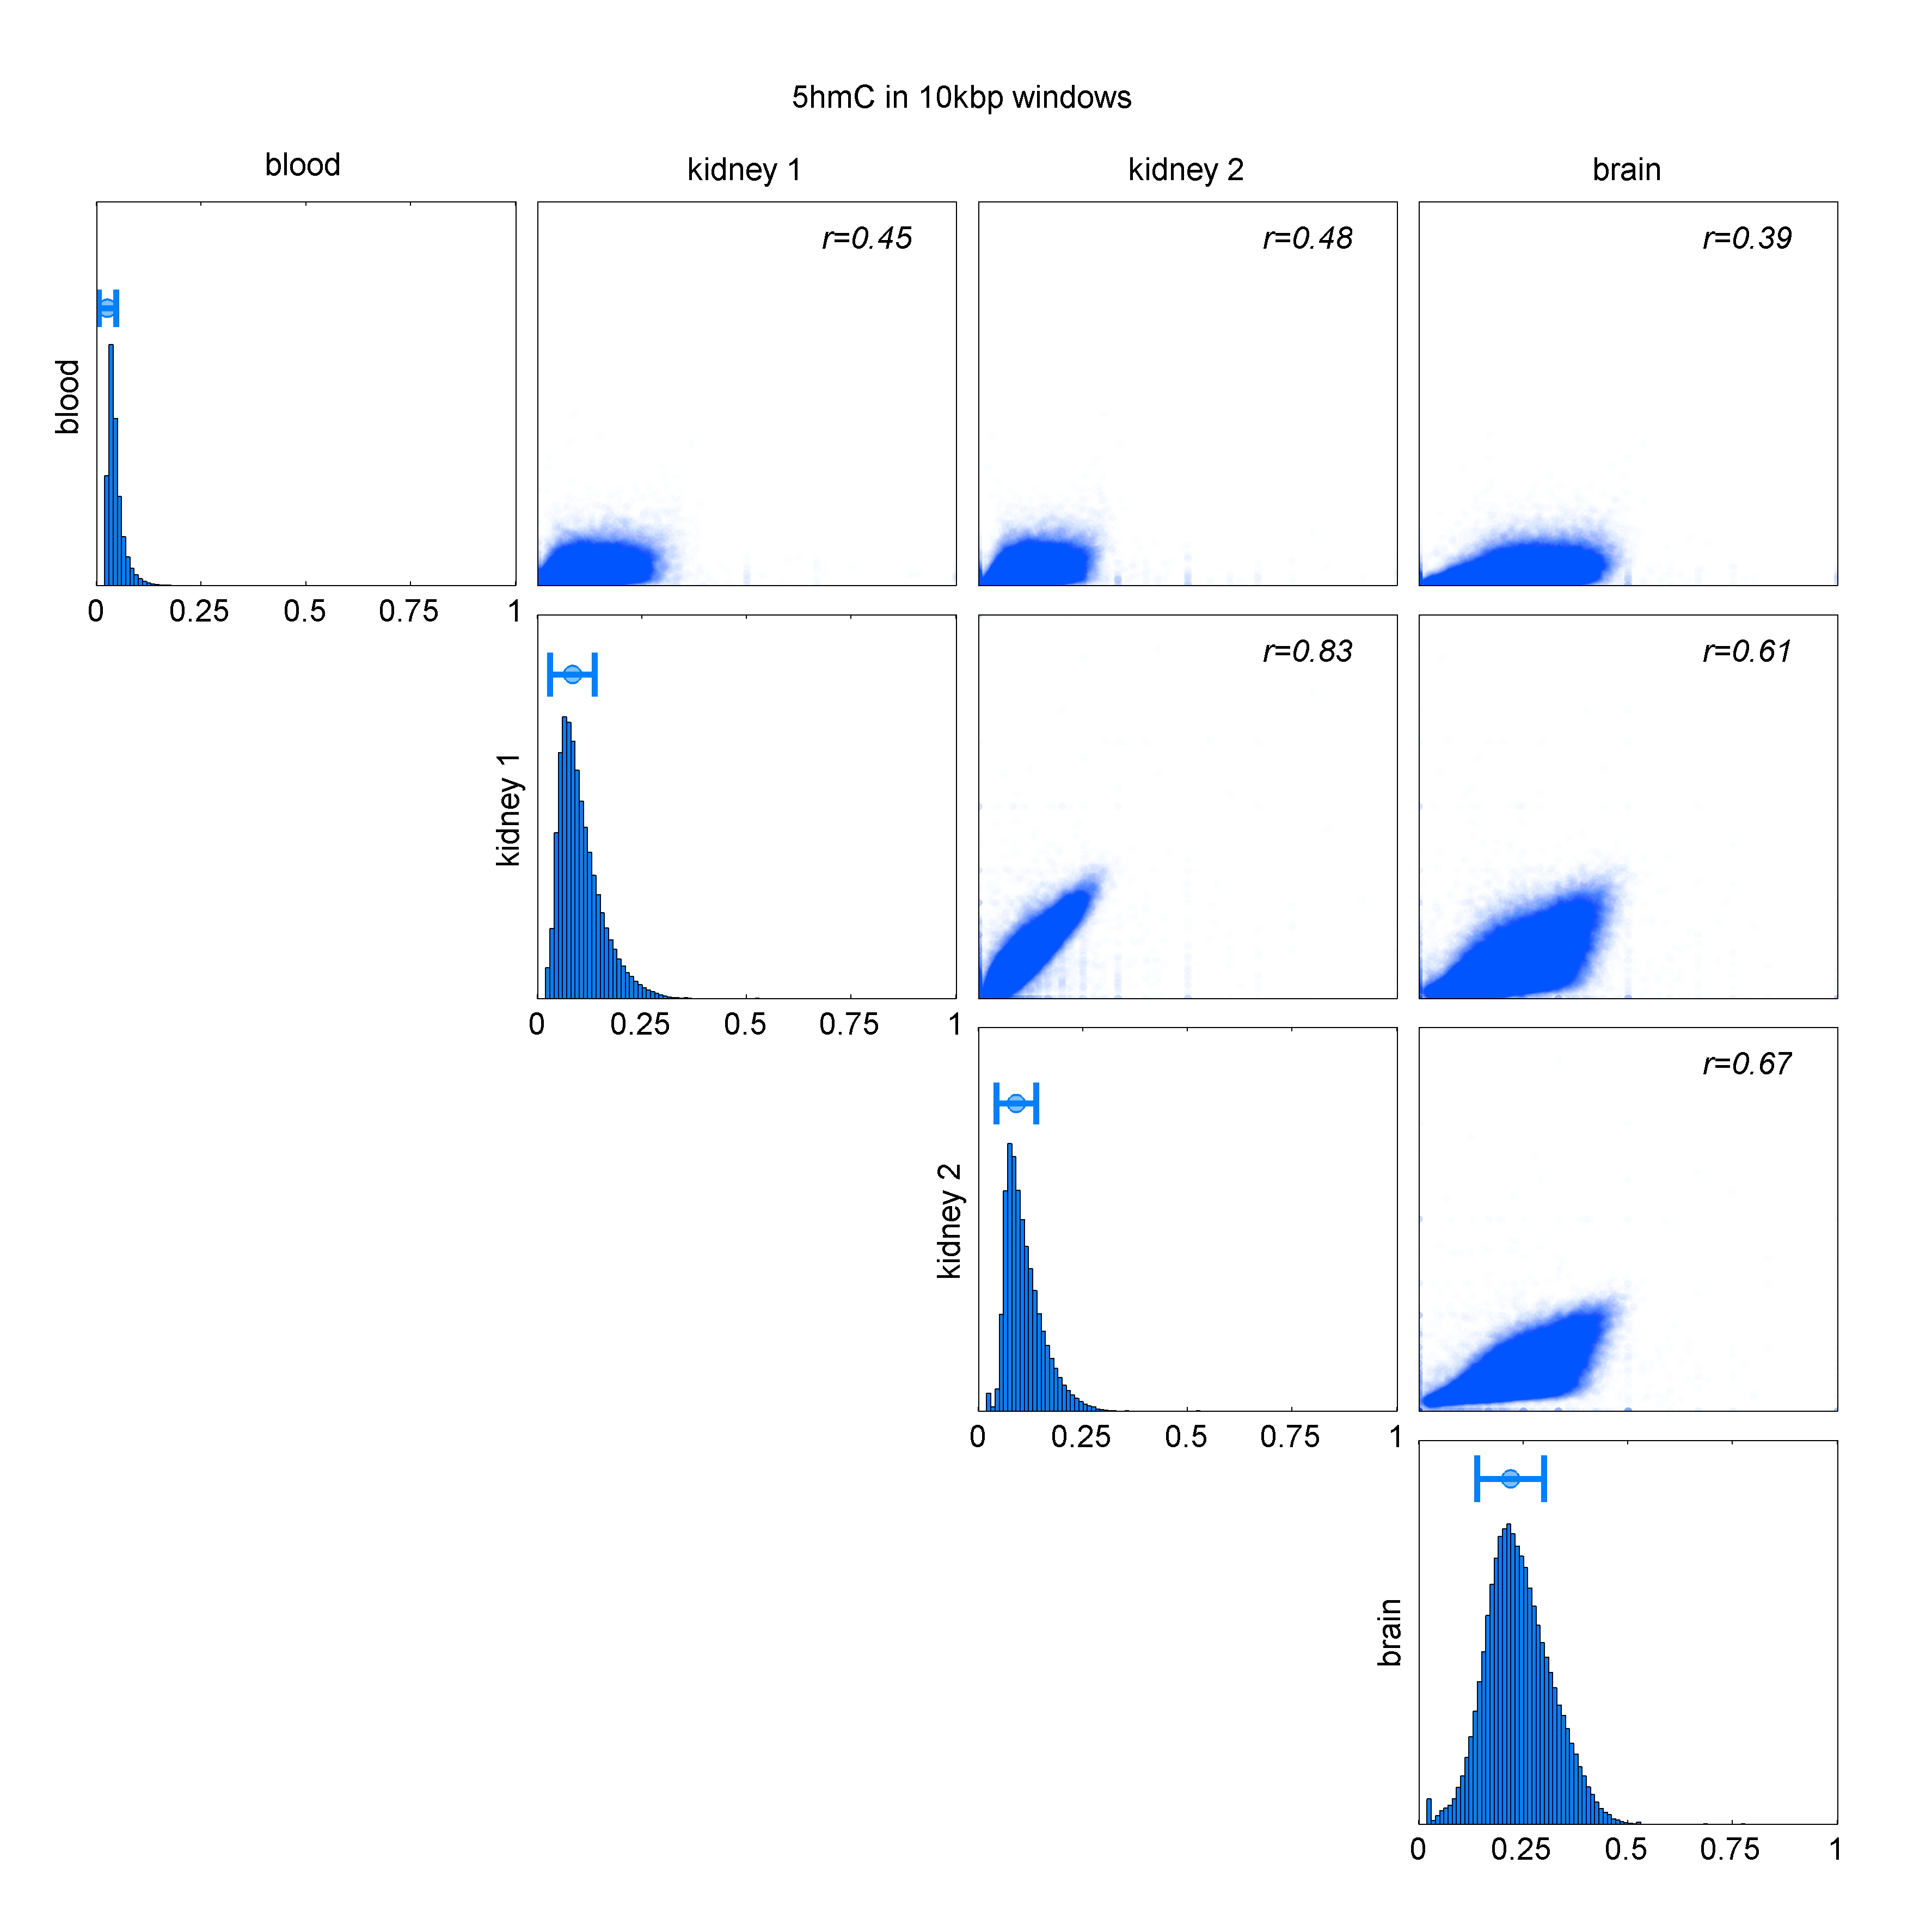

Supplement: supp [file elife-17082-supp-v1.zip › elife_poa_e17082_Figure_6_figure_supplement_2.tif]

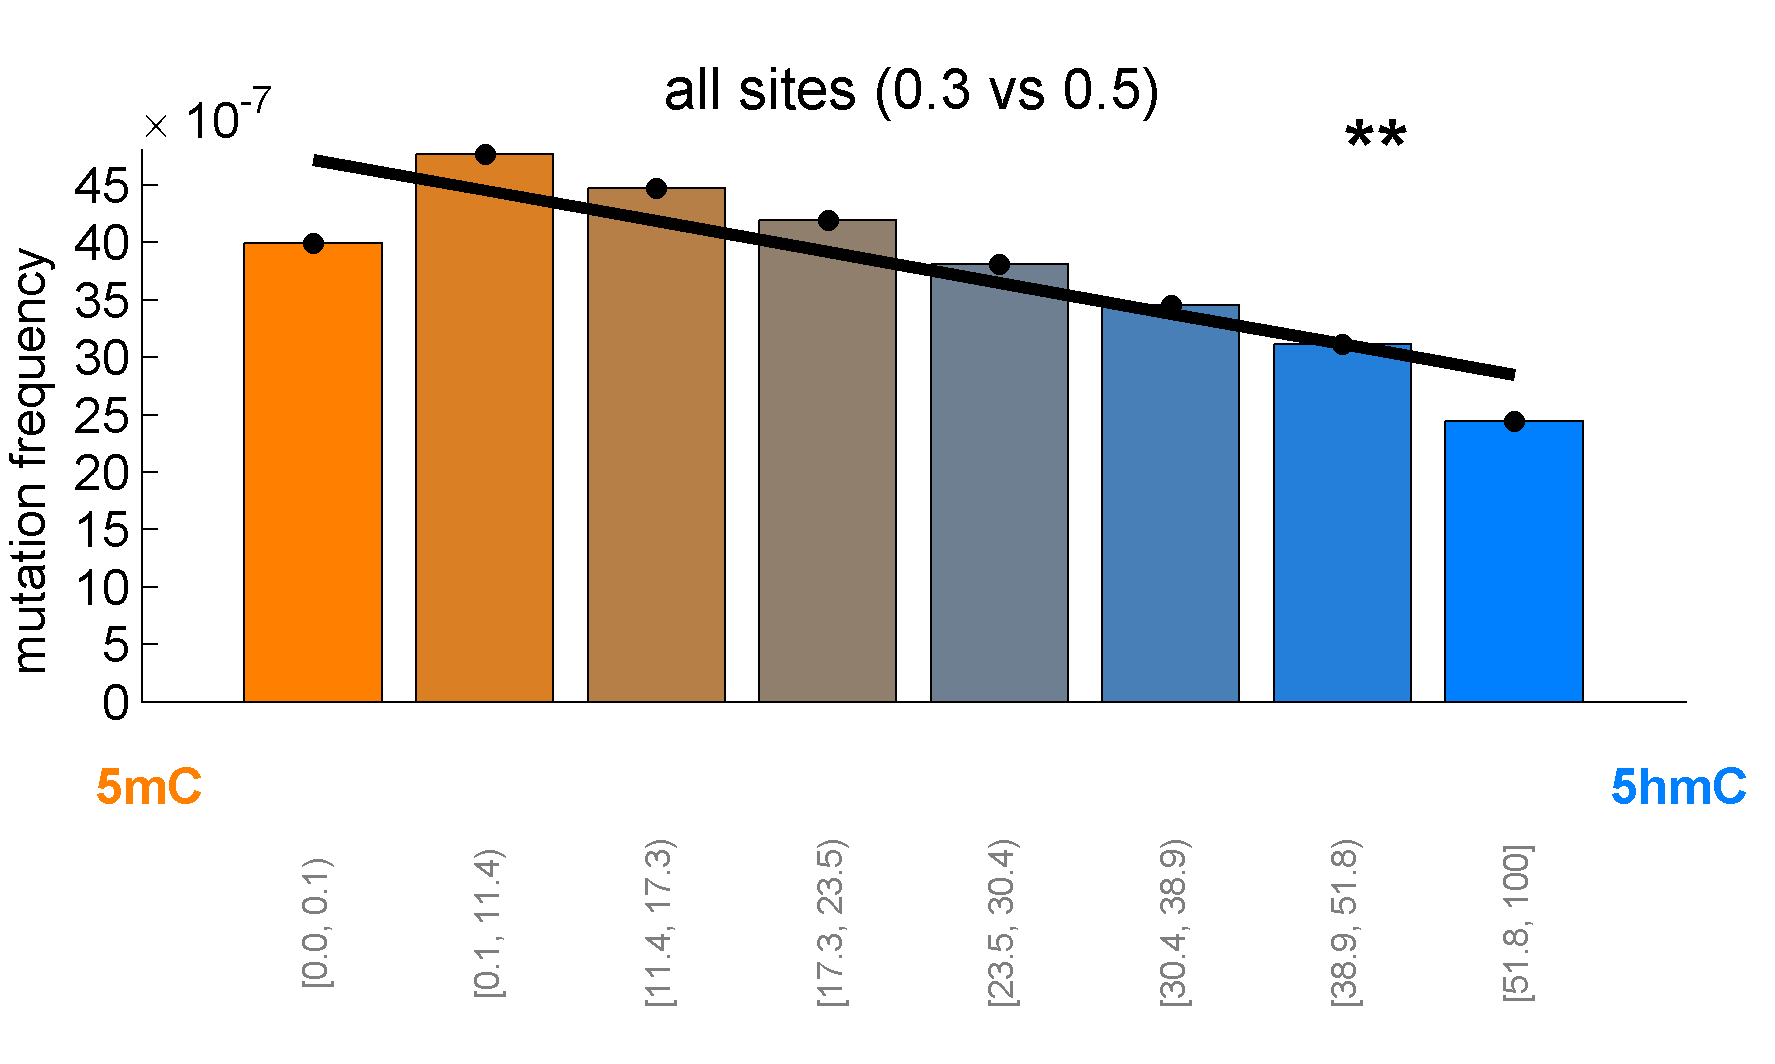

Supplement: supp [file elife-17082-supp-v1.zip › elife_poa_e17082_Figure_4_figure_supplement_1.tif]

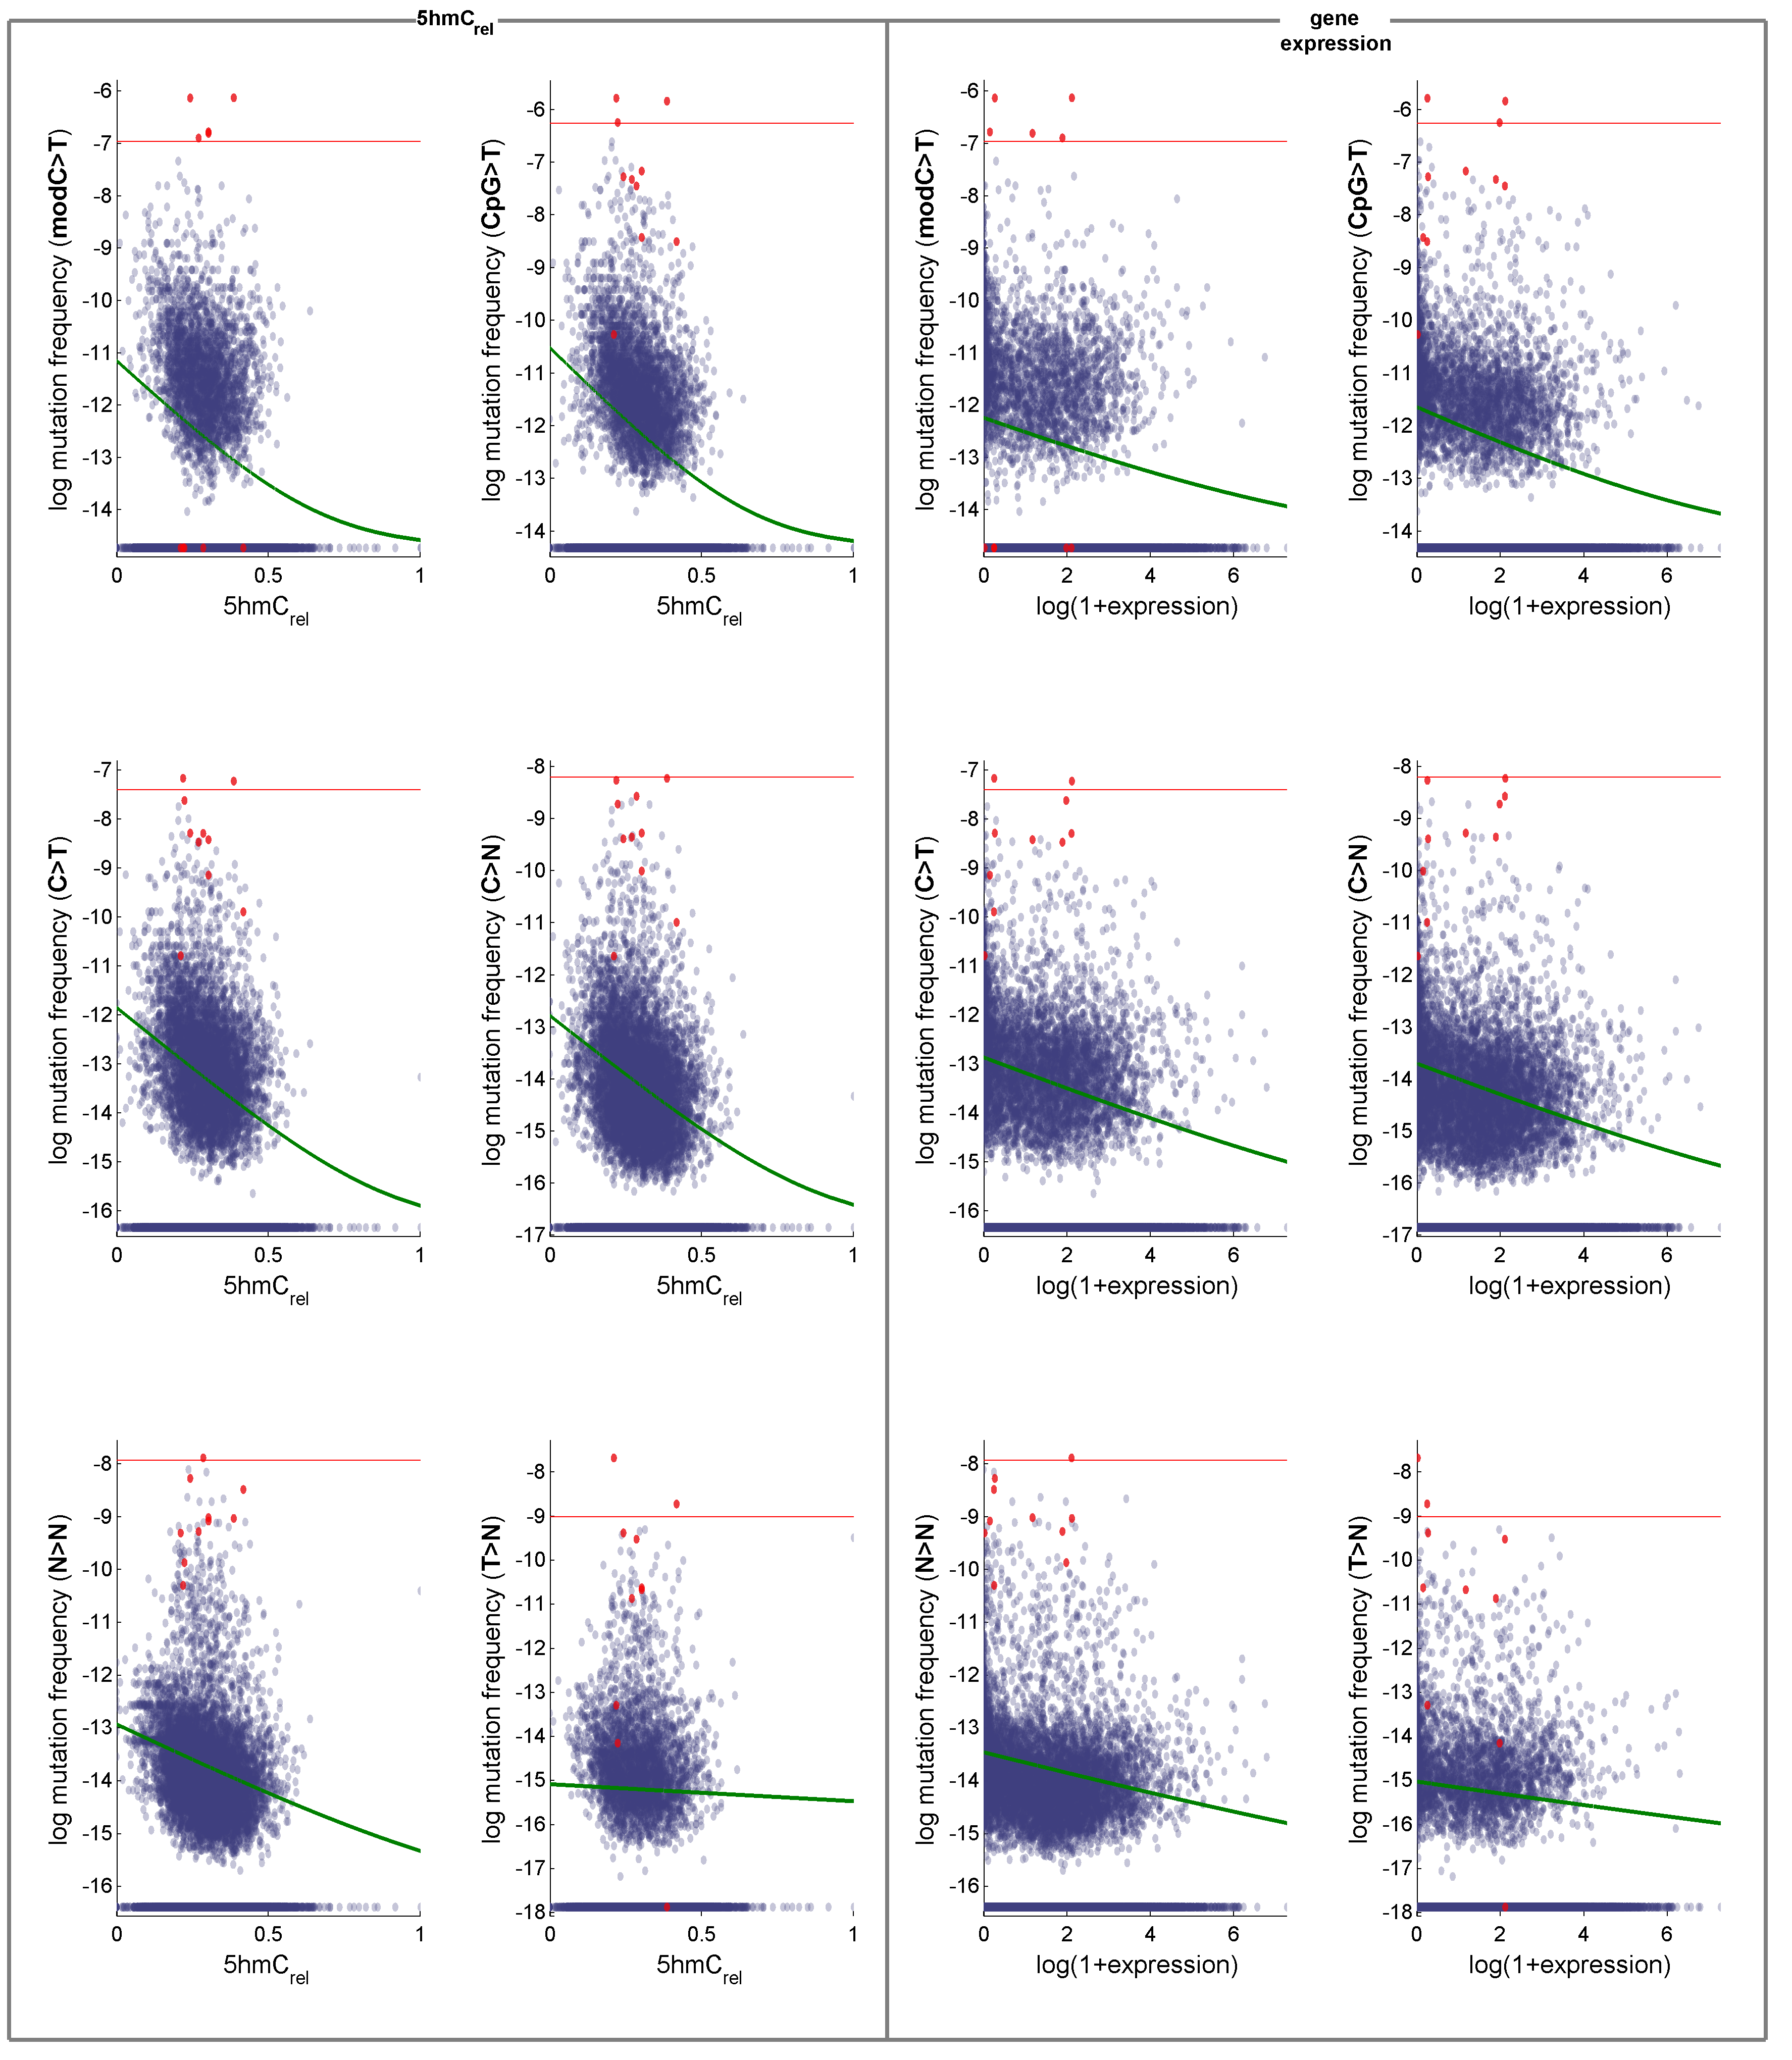

Supplement: supp [file elife-17082-supp-v1.zip › elife_poa_e17082_Figure_5_figure_supplement_2.tif]

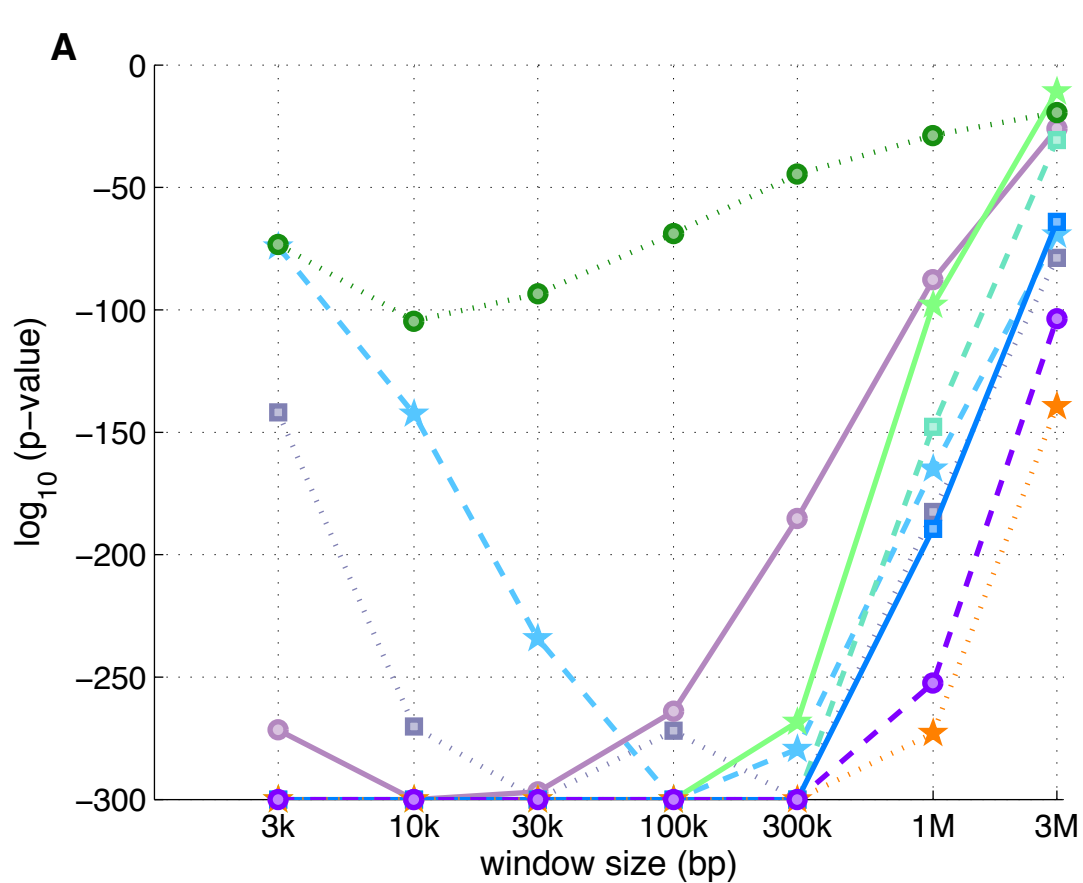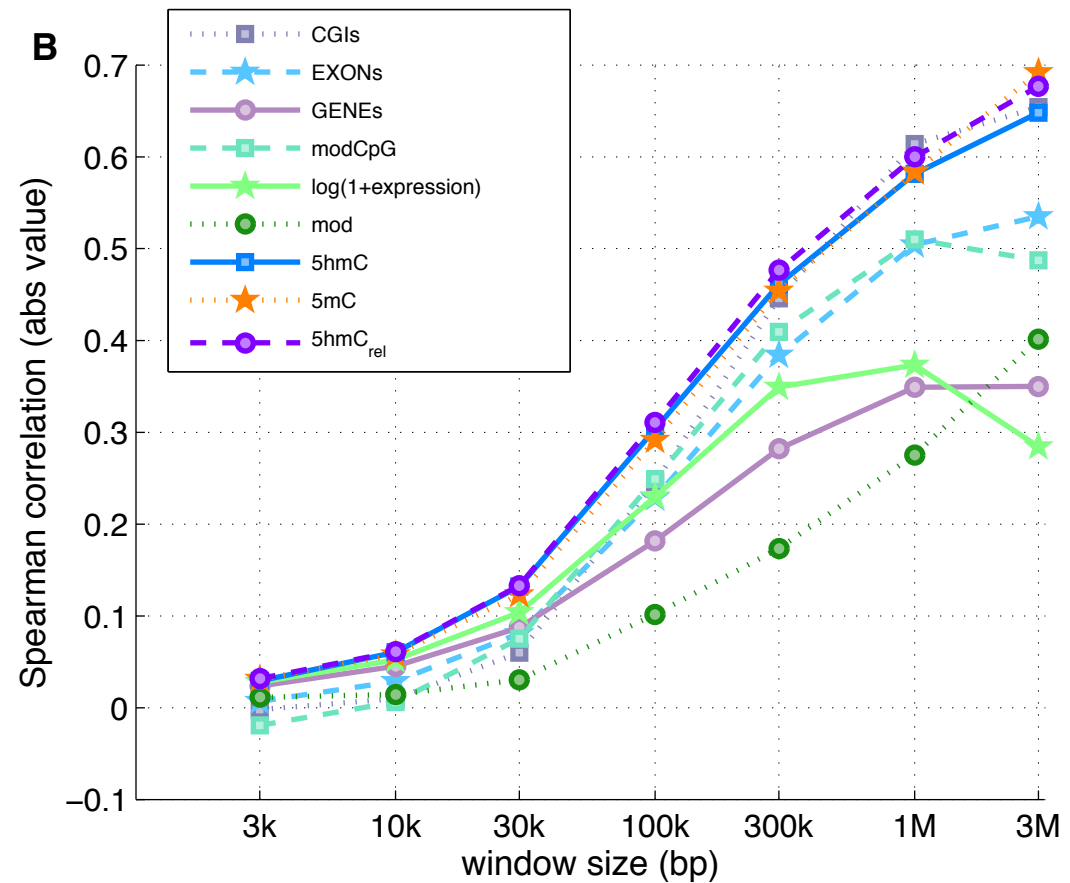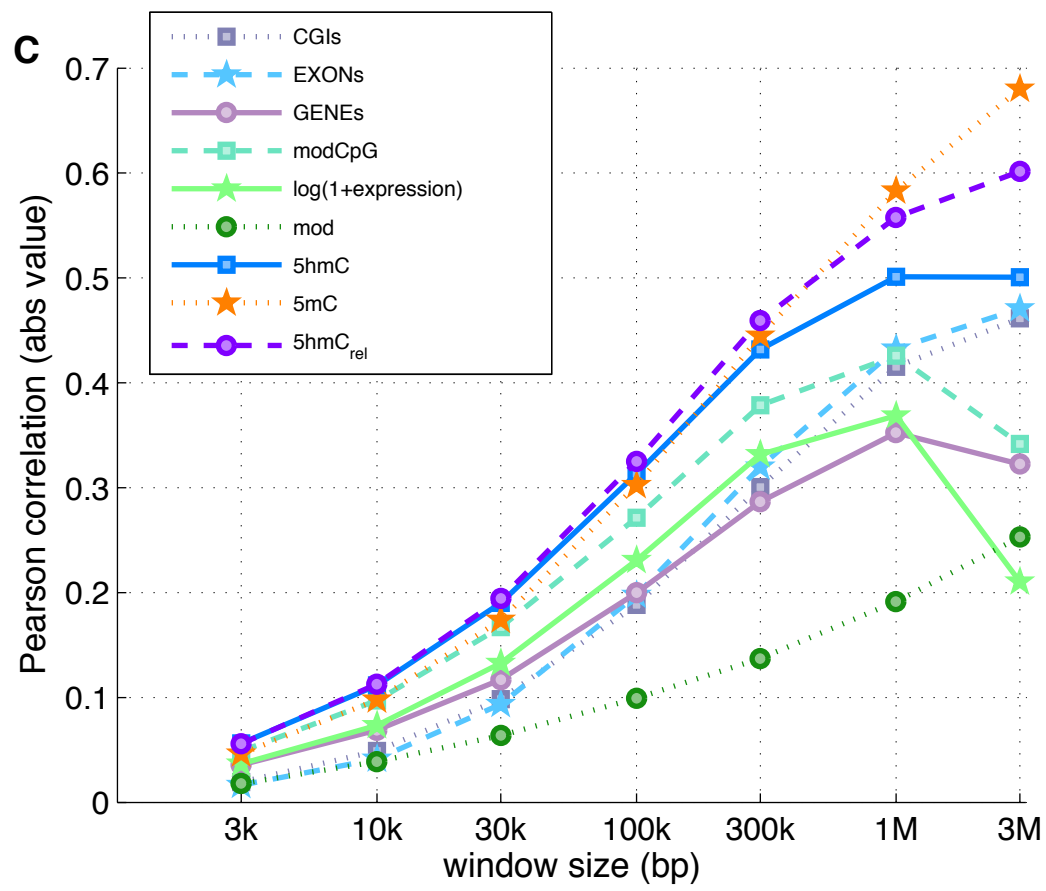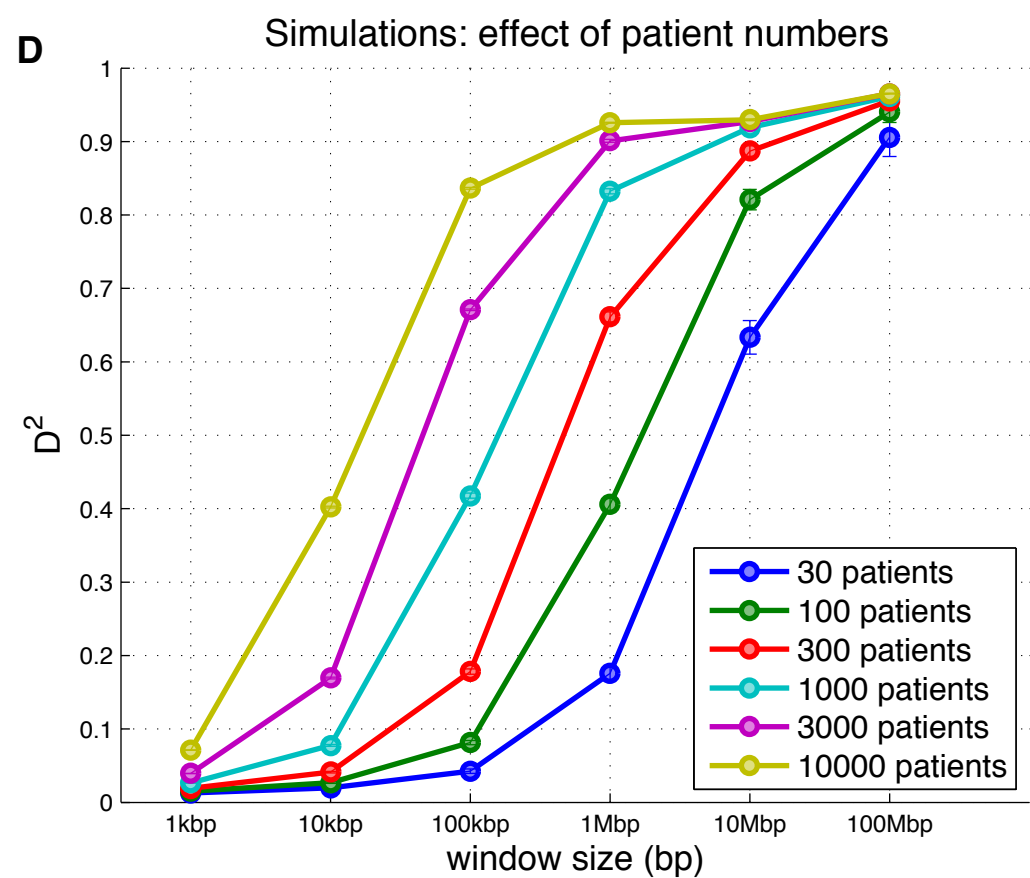

Supplement: supp [file elife-17082-supp-v1.zip › elife_poa_e17082_Figure_5_figure_supplement_1.pdf]
